# Supplementary material
Source: PubMed Central journal article supplement (PMC6072529)
Supplement: MD-008-C7MD00080D-s001.pdf [file MD-008-C7MD00080D-s001.pdf]

**Synthesis of novel inhibitors of  $\alpha$ -amylase based on thiazolidine-4-one skeleton containing pyrazole moiety and their configurational studies**

**Parvin Kumar<sup>a\*</sup>, Meenakshi Duhan<sup>a</sup>, Kulbir Kadyan<sup>a</sup>, Jayant Sindhu<sup>b</sup>, Sunil Kumar<sup>c</sup>, Hitender Sharma<sup>c</sup>**

<sup>a</sup>Department of Chemistry, Kurukshetra University Kurukshetra-136119

<sup>b</sup>S D (PG) College, Panipat-132103,

<sup>c</sup>Institute of Pharmaceutical Science, Kurukshetra University Kurukshetra-136119

\*E.mail: [parvinjangra@gmail.com](mailto:parvinjangra@gmail.com); [parvinchem@kuk.ac.in](mailto:parvinchem@kuk.ac.in)

**Synthesis of 2-(*p*-tolylimino)thiazolidin-4-one (3) [1]**

It was prepared by a three component reaction of 1-*p*-tolylthiourea (1) (1.0 mmol), ethyl bromoacetate (1.0 mmol) and sodium acetate (2.0 mmol) in glacial acetic acid under the refluxing condition for 2 h. After completion of reaction, reaction was quenched using ice and the solid so formed was filtered under suction and recrystallized from ethanol. Yield 80%; M.pt: 167-170°C.

**Synthesis of 5-((3-(aryl)-1-phenyl-1*H*-pyrazol-4-yl)methylene)-2-(*p*-tolylimino)thiazolidin-4-one (5a-g) [1]**

2-Arylimino-thiazolidin-4-ones **1** (0.5 mmol) and 1-phenyl-3-(*p*-substituted phenyl)-1*H*-pyrazole-4-carbaldehydes **2** (0.6 mmol) were dissolved in absolute ethanol. Piperidine (0.5 mmol) was added to the reaction mixture and the reaction mixture was stirred for 8 h at 60°C until precipitate formed. Then the mixture was cooled to room temperature, and the precipitates formed were filtered and washed with absolute ethanol to yield the final compound **5a-5g** in good to excellent yield.

**Table S1:** Percentage of peaks of *E* and *Z* isomers present in **5a-5g** in DMSO-*d*<sub>6</sub>

| Compound  | Pyr-H (H <sub>17</sub> ) |                  | H <sub>10/12</sub>                    |                  | H <sub>28/32</sub>         |                  | C-CH <sub>3</sub> (C-14) |                  |
|-----------|--------------------------|------------------|---------------------------------------|------------------|----------------------------|------------------|--------------------------|------------------|
|           | <i>E</i> -isomer         | <i>Z</i> -isomer | <i>Z</i> -isomer                      | <i>E</i> -isomer | <i>E</i> -isomer           | <i>Z</i> -isomer | <i>Z</i> -isomer         | <i>E</i> -isomer |
| <b>5a</b> | 8.61<br>(39.2%)          | 8.52<br>(61.7%)  | <sup>b</sup> 7.19-<br>7.21<br>(59.1%) | 6.97<br>(40.8%)  | 7.96<br>(40.7%)            | 7.92<br>(59.3%)  | 2.31<br>(60.3%)          | 2.30<br>(39.6%)  |
| <b>5b</b> | 8.64<br>(39.8%)          | 8.54<br>(60.1%)  | <sup>b</sup> 7.19-<br>7.21<br>(59.1%) | 6.96<br>(40.8%)  | 7.97<br>(40.6%)            | 7.93<br>(59.3%)  | 2.31<br>(60.0%)          | 2.30<br>(39.9%)  |
| <b>5c</b> | 8.30<br>(38.8%)          | 8.18<br>(61.1%)  | <sup>b</sup> 6.93-<br>6.98            | 6.74<br>(40%)    | 7.72<br>(37.7%)            | 7.66<br>(62.2%)  | 2.13<br>(62.9%)          | 2.11<br>(37.1%)  |
| <b>5d</b> | 8.58<br>(37.1%)          | 8.47<br>(62.8%)  | <sup>a</sup> -                        | <sup>a</sup> -   | 7.93<br>(37.0%)            | 7.88<br>(62.2%)  | 2.31<br>(62.4%)          | 2.30<br>(37.5%)  |
| <b>5e</b> | 8.54<br>(28.1%)          | 8.42<br>(71.8%)  | <sup>a</sup> -                        | <sup>a</sup> -   | <sup>a</sup> -             | <sup>a</sup> -   | 2.31<br>(62.6%)          | 2.30<br>(37.3%)  |
| <b>5f</b> | 8.56<br>(39.1%)          | 8.44<br>(60.8%)  | <sup>b</sup> 7.11-<br>7.18            | 6.93<br>(40%)    | 7.92<br>(42.3%)            | 7.87<br>(57.6%)  | 2.31<br>(61.2%)          | 2.30<br>(38.7%)  |
| <b>5g</b> | 8.61<br>(42.0%)          | 8.49<br>(58.4%)  | <sup>a</sup> 7.14-<br>7.16            | 6.91<br>(40%)    | <sup>b</sup> 7.93-<br>7.96 | -                | 2.31<br>(61.2%)          | 2.30<br>(38.7%)  |

<sup>a</sup> Signals are not separated<sup>b</sup> Mixed with multiplet**Table S2:** DFT Calculations for different configuration of **5a**

| Configuration                   | <i>2Z,5Z</i> | <i>2E,5E</i> | <i>2Z,5E</i> | <i>2E,5Z</i> |
|---------------------------------|--------------|--------------|--------------|--------------|
| Dipole moment (Debye)           | 3.97         | 3.15         | 1.24         | 1.49         |
| Difference in energy(kcal/mole) | 0            | 71.04        | 60.14        | 2.08         |

Fig: S1

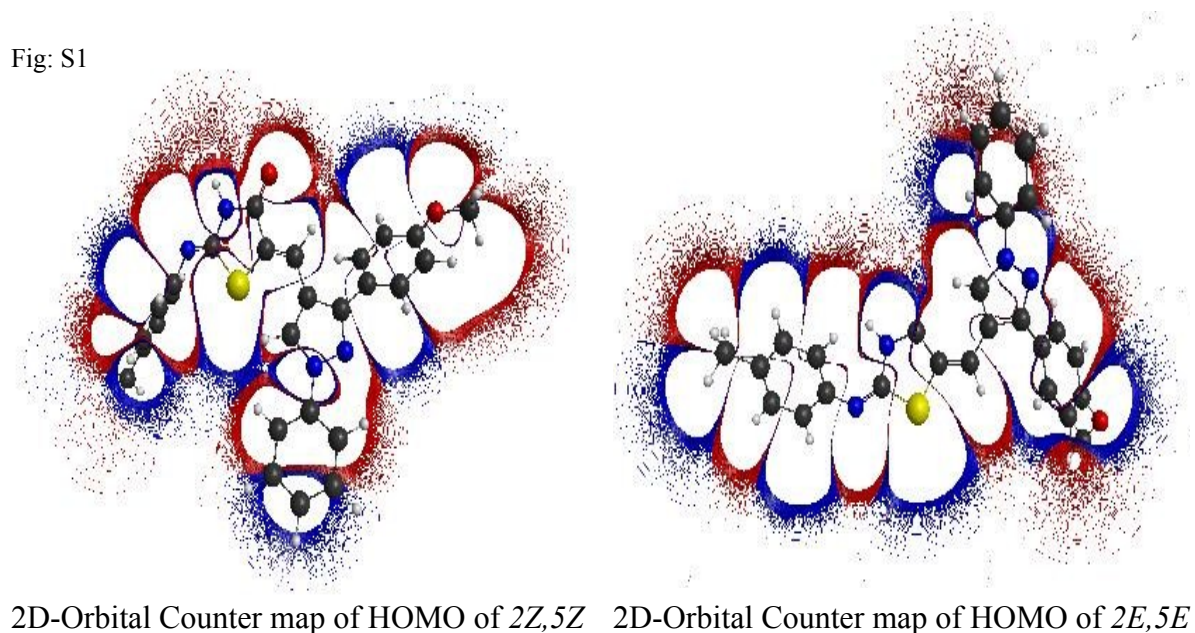

Fig: S2

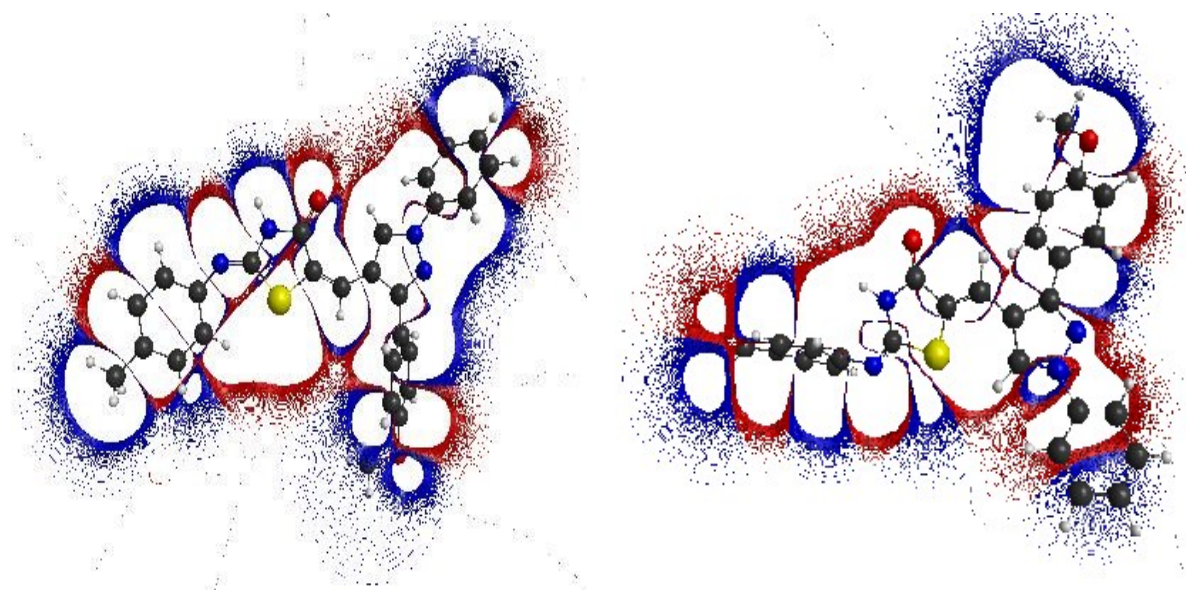

2D-Orbital Counter map of HOMO of 2Z,5E

2D-Orbital Counter map of HOMO of 2E,5Z

Fig: S3

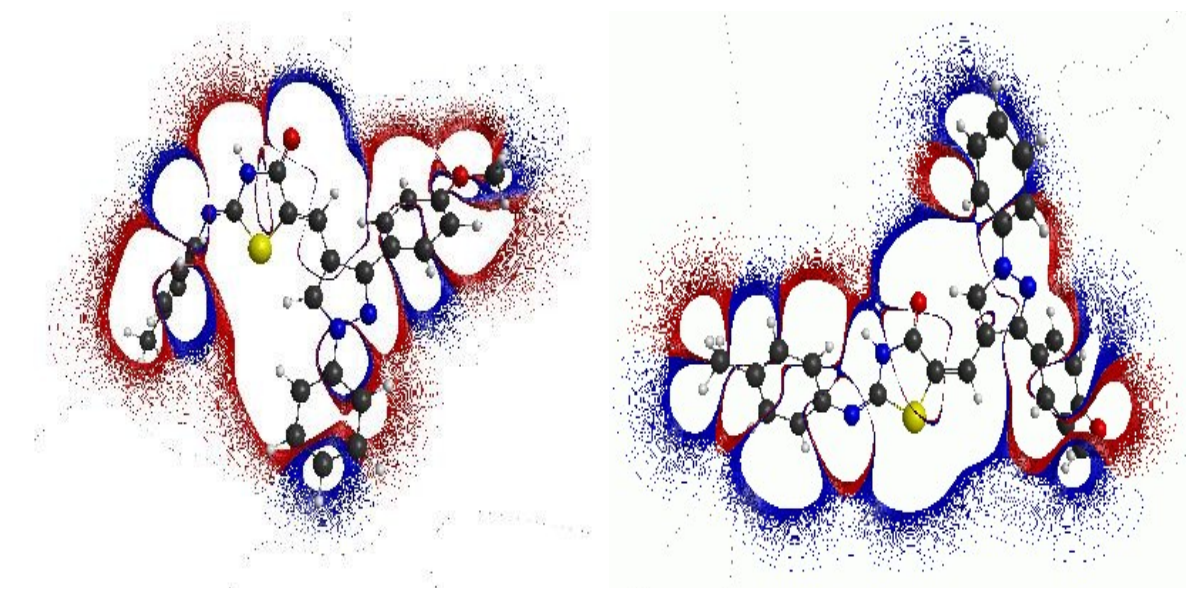

2D-Orbital Counter map of LUMO of 2Z,5Z

2D-Orbital Counter map of LUMO of 2E,5E

Fig: S4

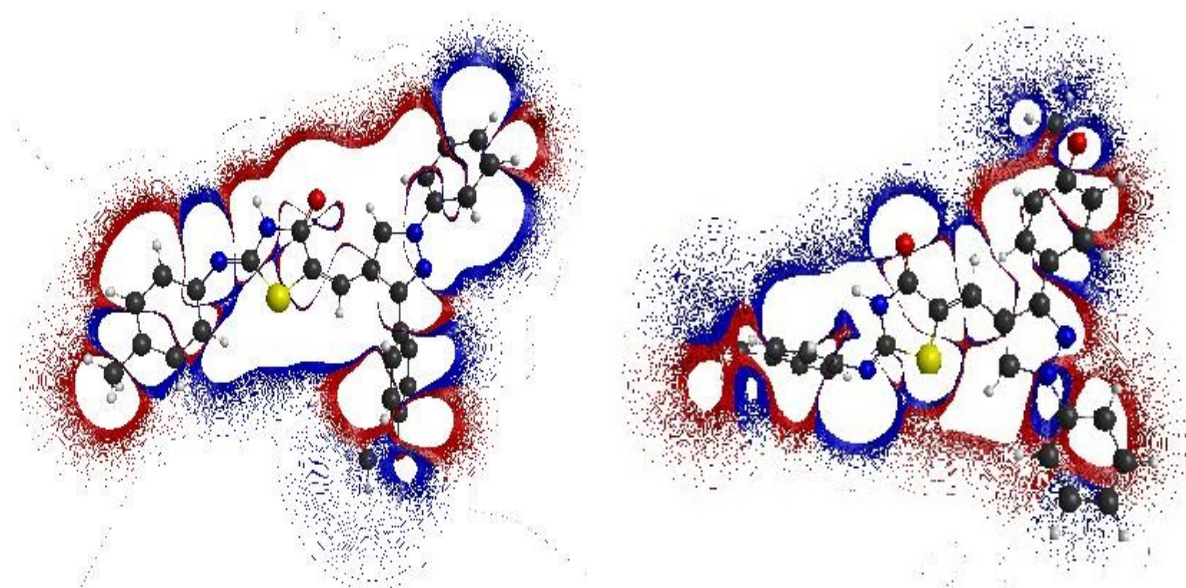

2D-Orbital Counter map of LUMO of 2Z,5E

2D-Orbital Counter map of LUMO of 2E,5Z

Fig: S5

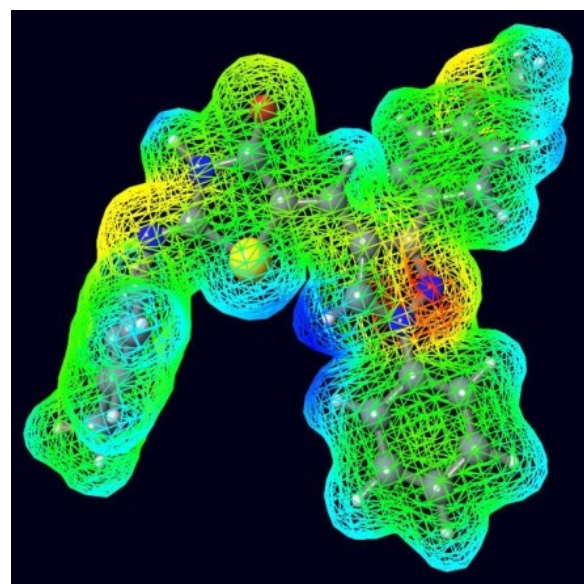

Molecular electrostatic potential surface at 0.01 of 2Z,5Z

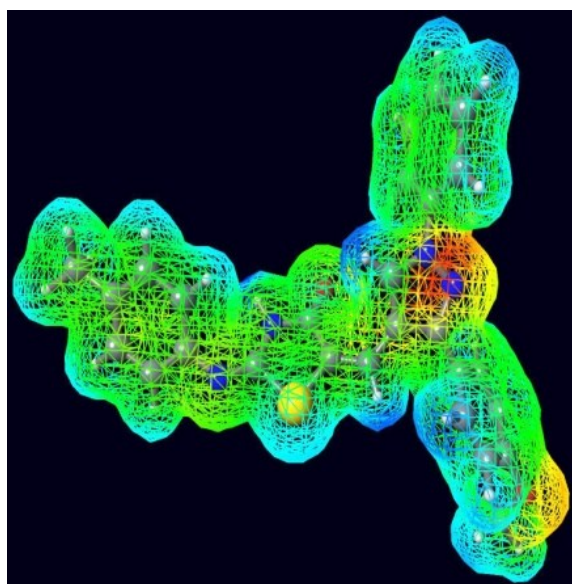

Molecular electrostatic potential surface at 0.01 of 2E,5E

Fig: S6

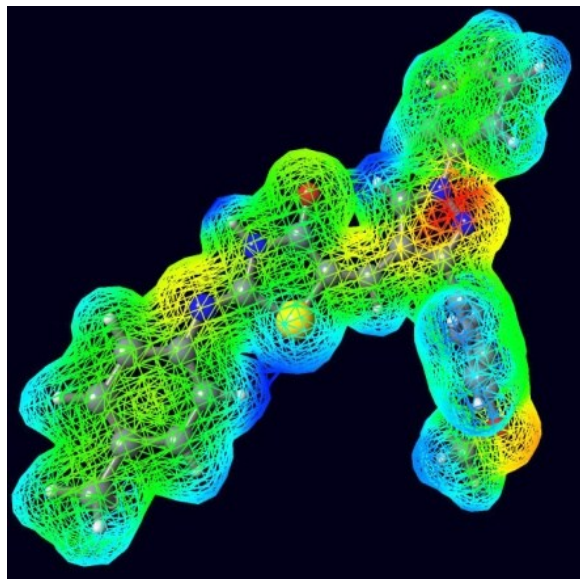

Molecular electrostatic potential surface at 0.01 of  
*2Z,5E*

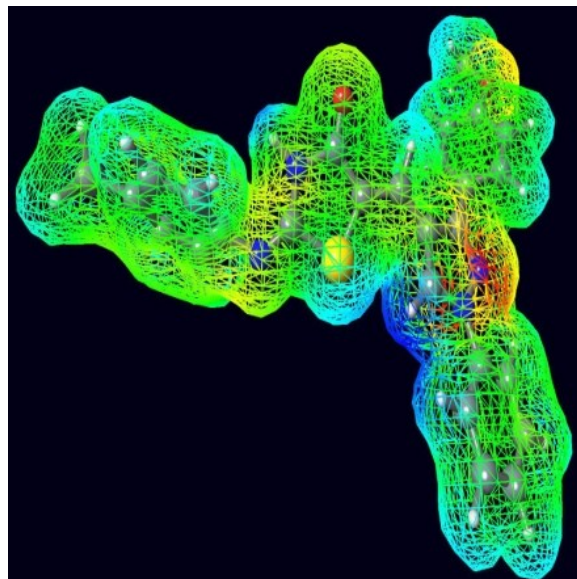

Molecular electrostatic potential surface at 0.01 of  
*2E,5Z*

# $^1\text{H}$ NMR spectrum of 3

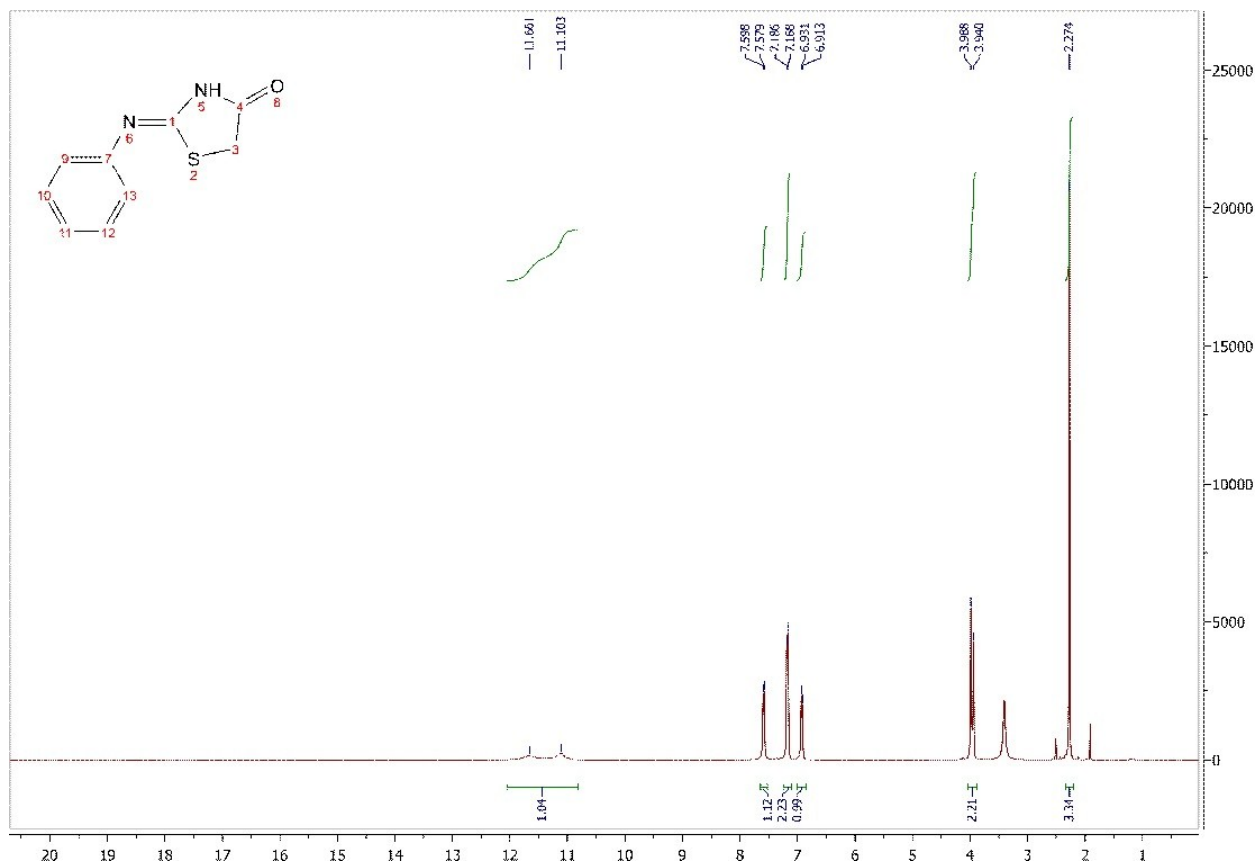

$^1\text{H}$  NMR spectrum of **5a(1)**(DMSO)

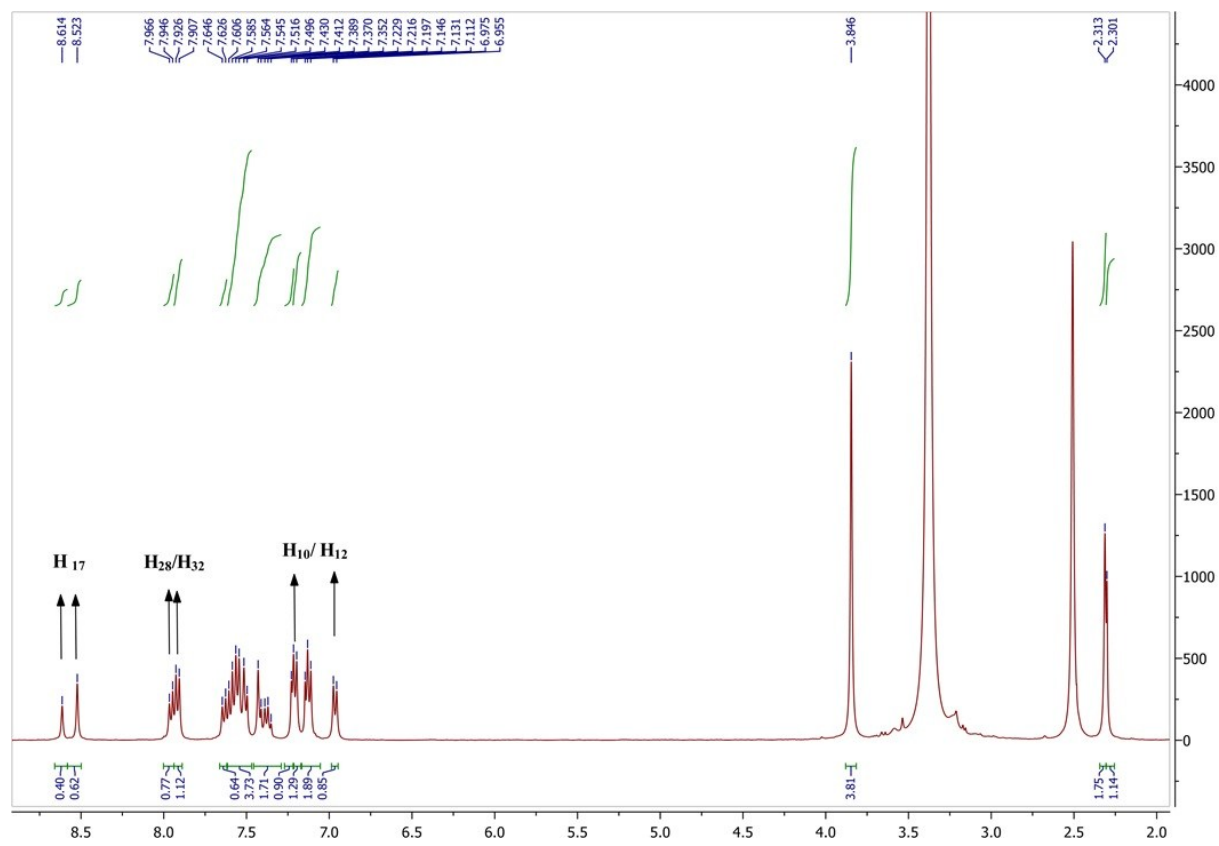

<sup>1</sup>H NMR spectrum of **5a(2)**(DMSO)

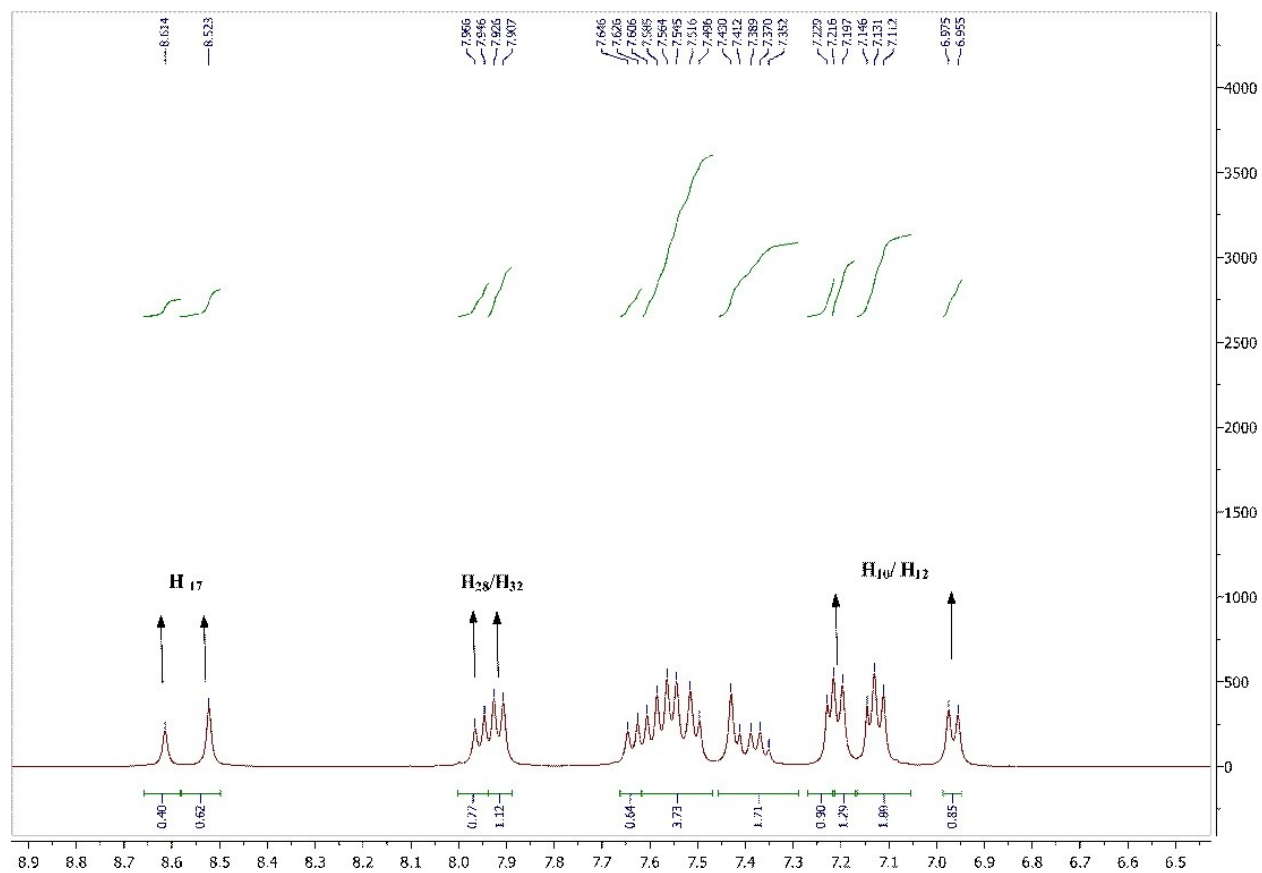



# <sup>1</sup>H NMR spectrum of 5a(3)(DMSO)

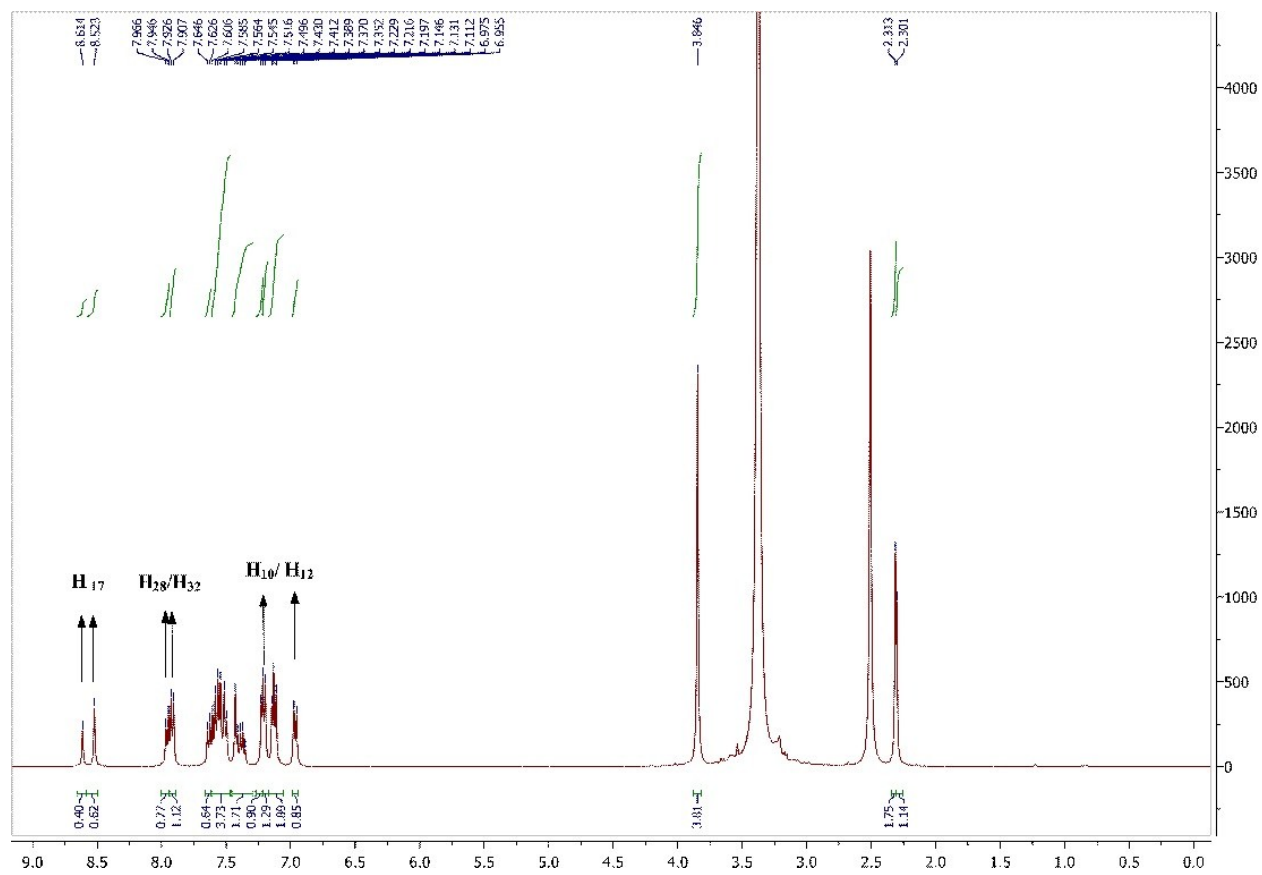

**$^1\text{H}$ - $^1\text{H}$  2D-1 spectrum of 5a(DMSO)**

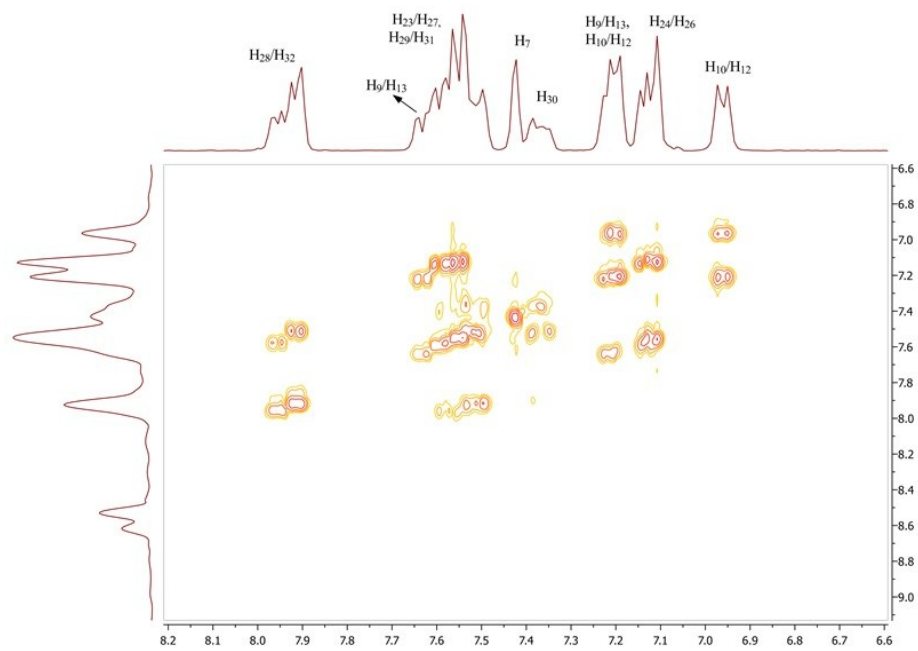

**$^1\text{H}$ - $^1\text{H}$  2D-2 spectrum of 5a (DMSO)**

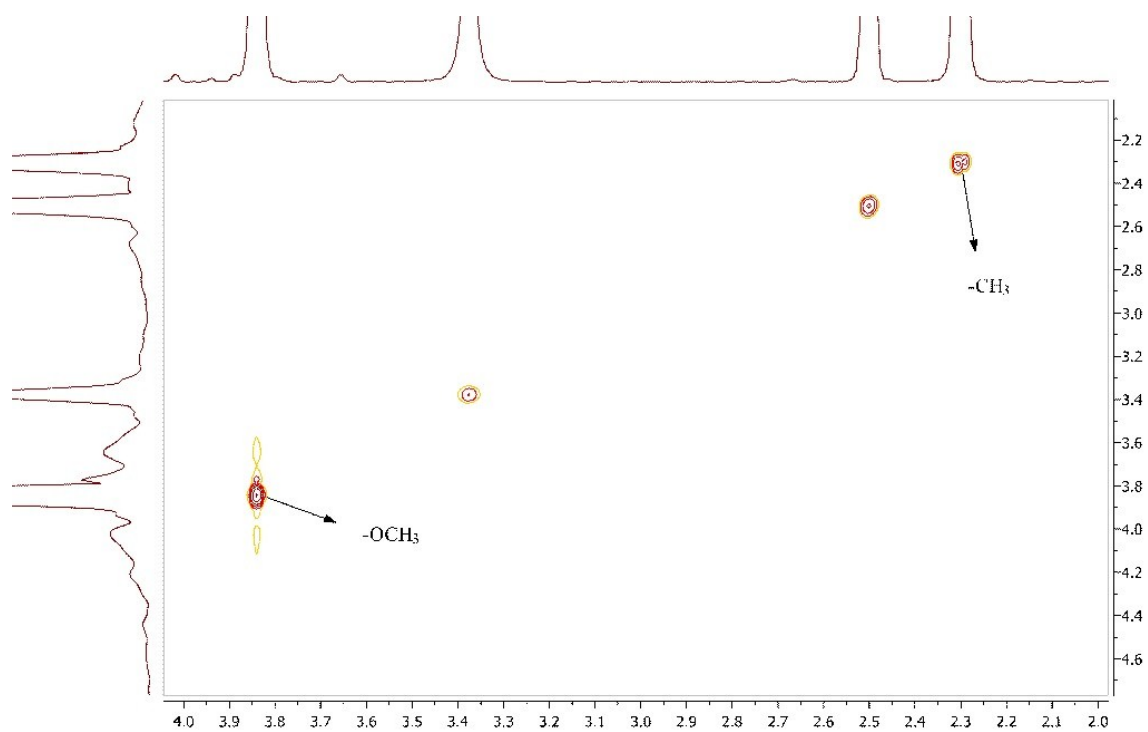

**$^1\text{H}$ - $^1\text{H}$  2D-3 spectrum of 5a (DMSO)**

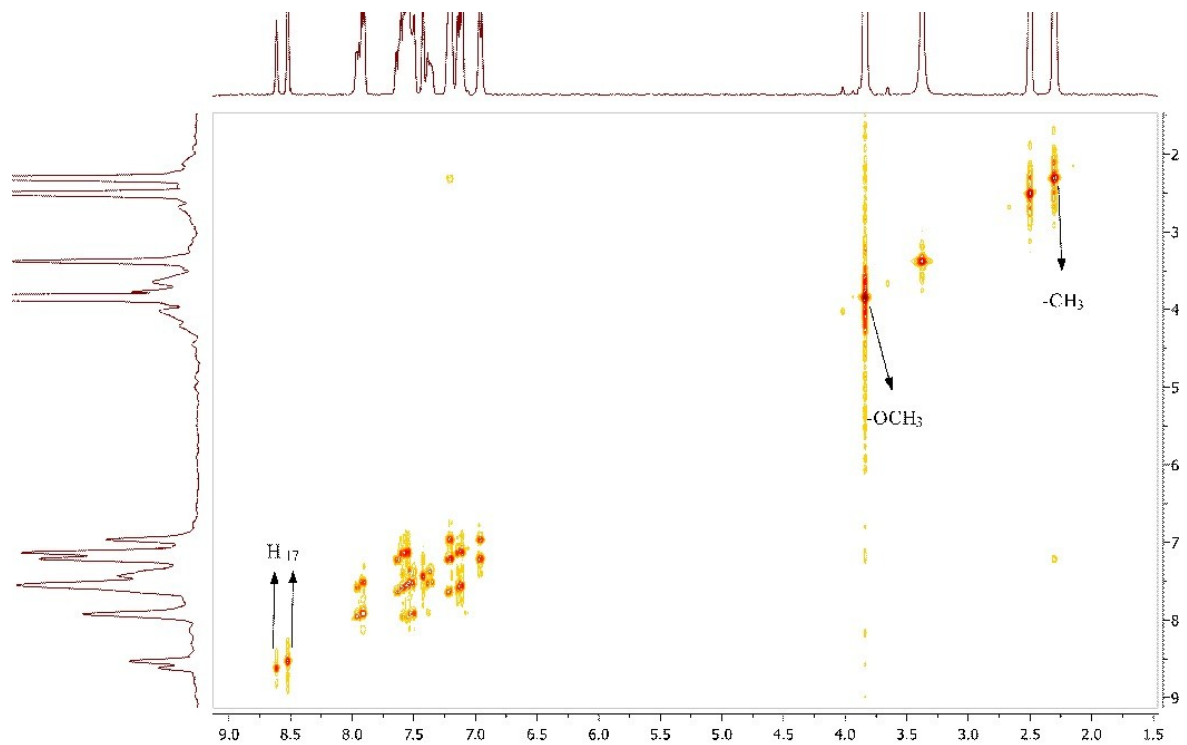

**$^1\text{H}$ - $^1\text{H}$  2D-4 spectrum of 5a (DMSO)**

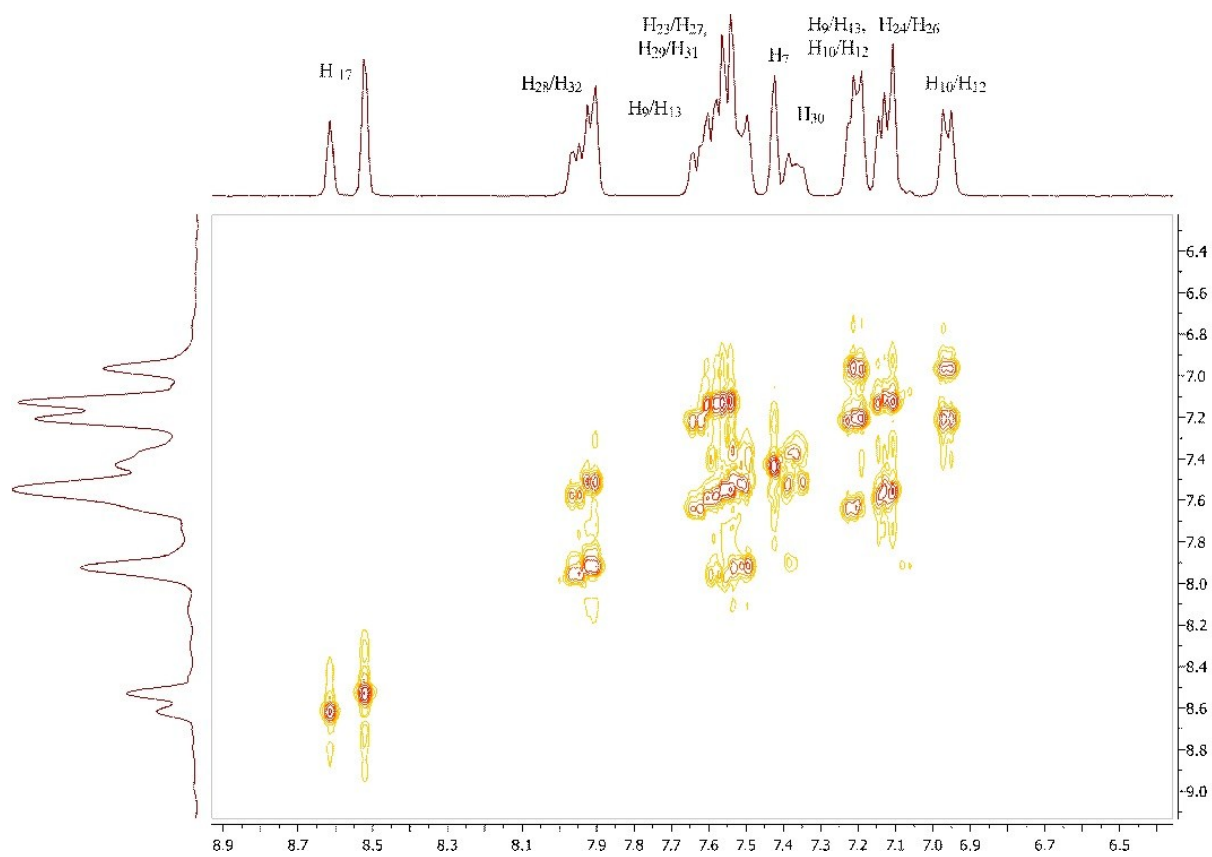

# <sup>1</sup>H NMR spectrum of 5a(1) (TFA)

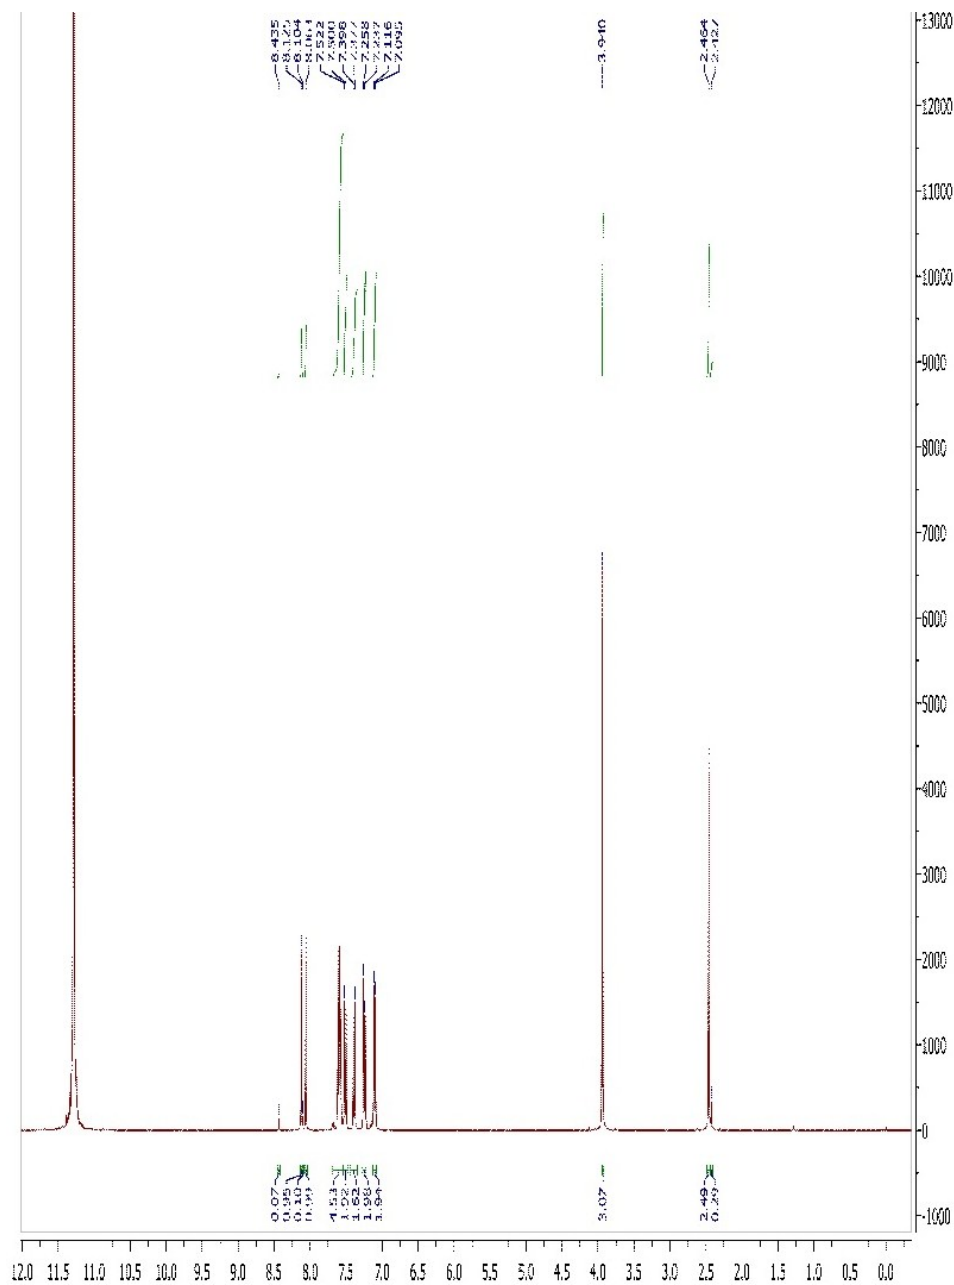

**<sup>1</sup>H NMR spectrum of 5a(2) (TFA)**

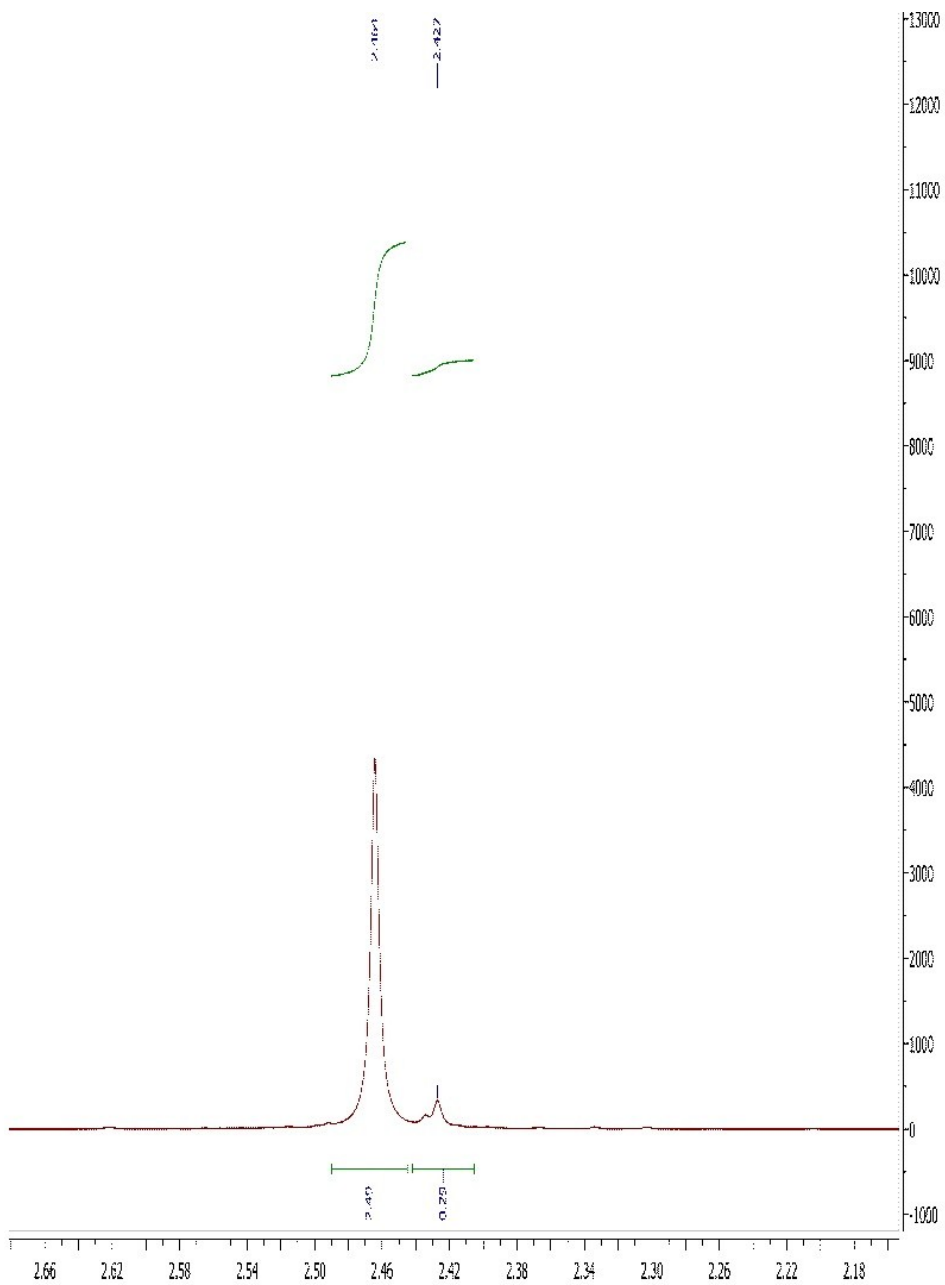

# <sup>1</sup>H NMR spectrum of 5a(3) (TFA)

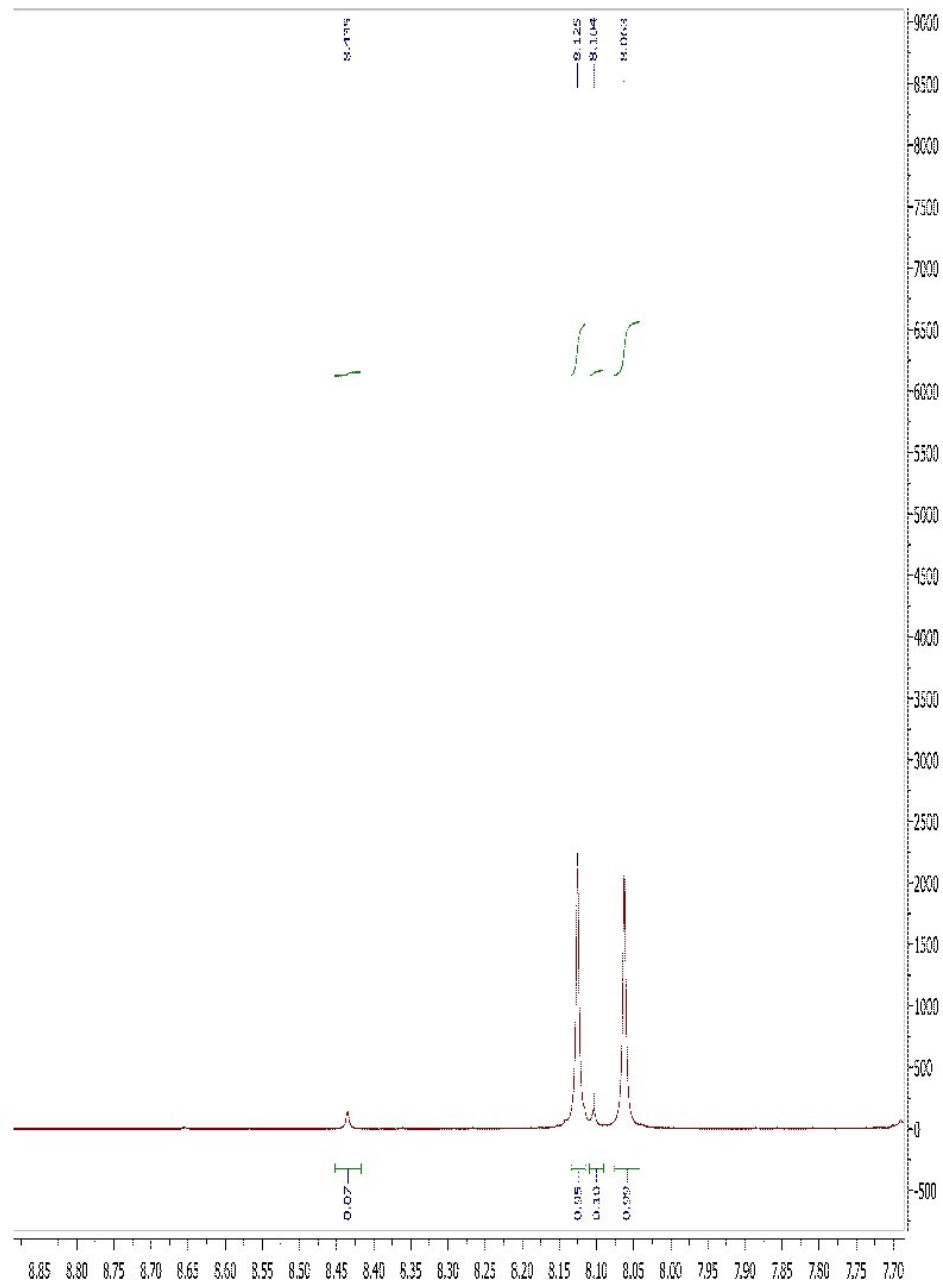



# <sup>1</sup>H NMR spectrum of 5b(1)

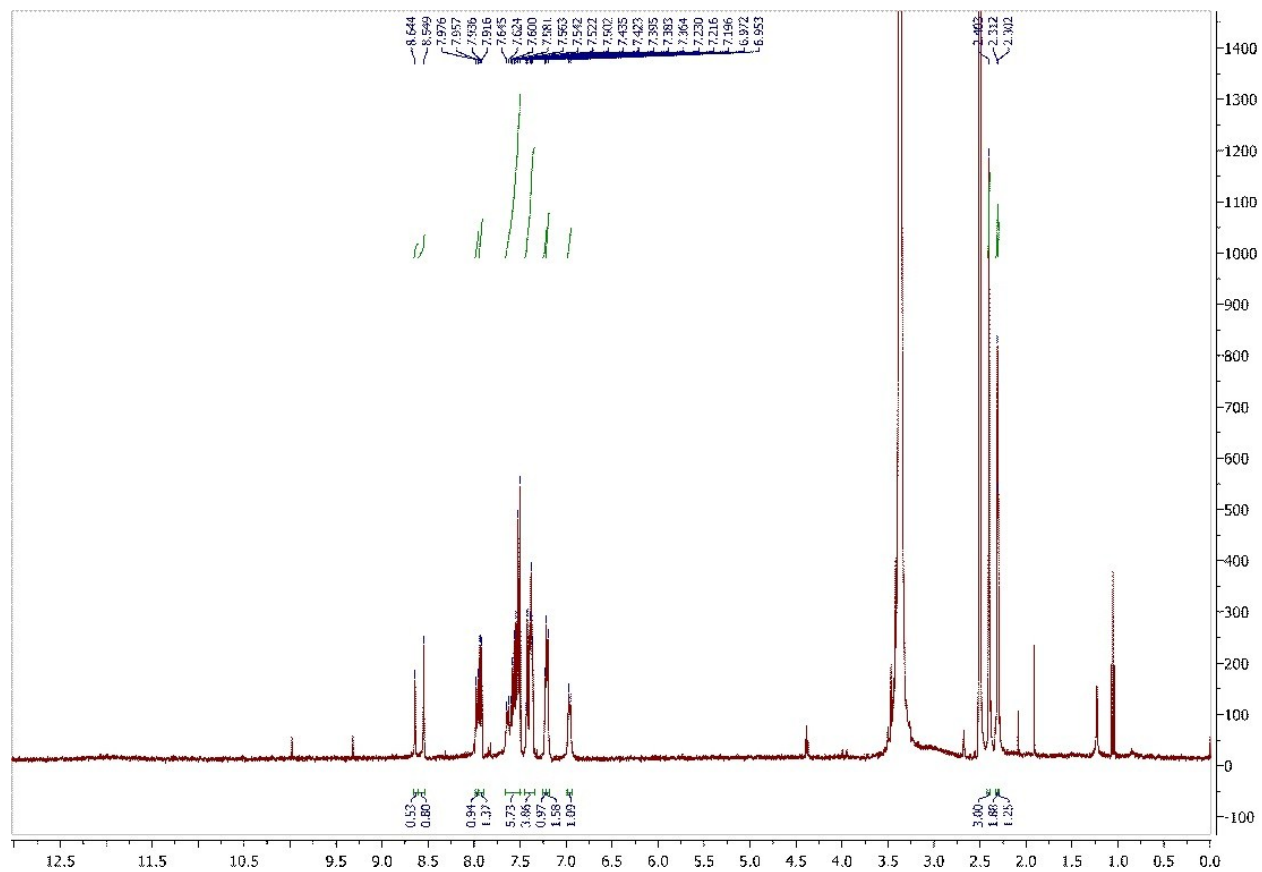

# <sup>1</sup>H NMR spectrum of 5b(2)

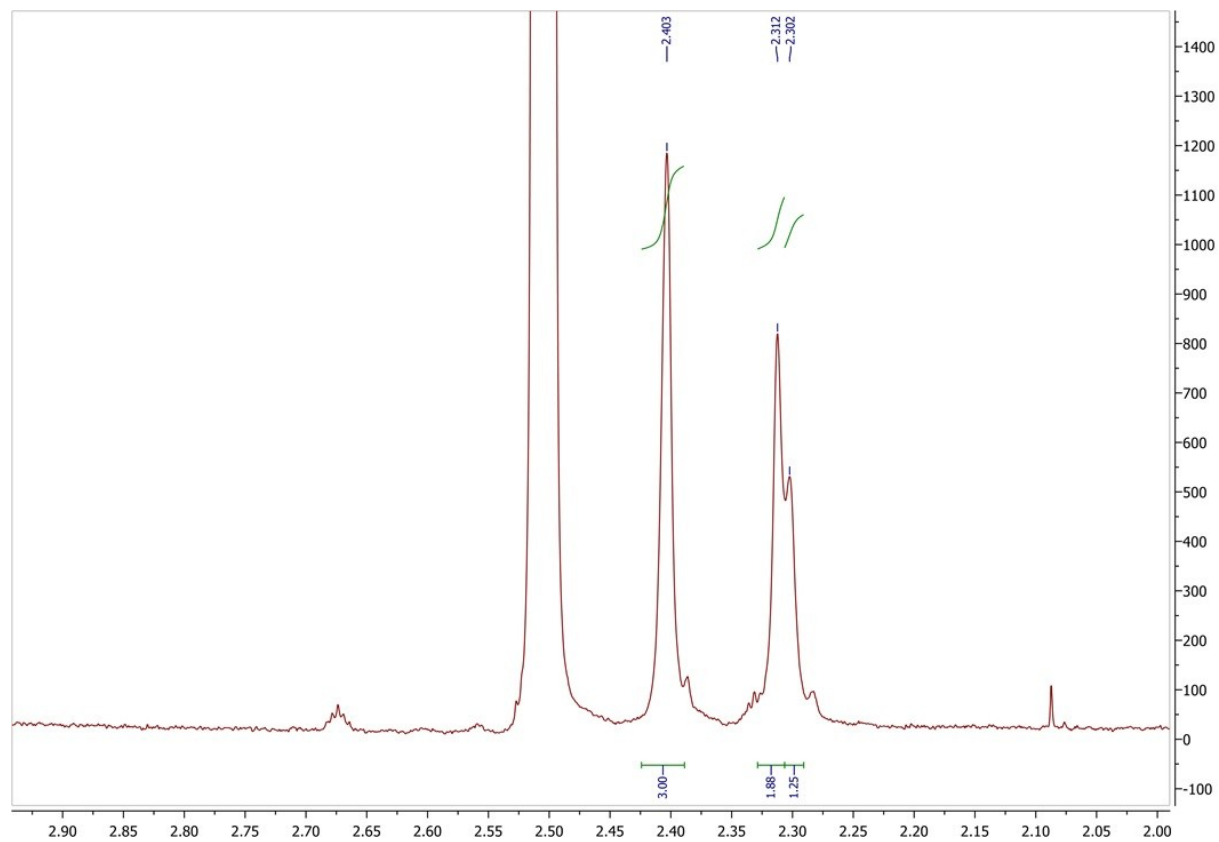

# <sup>1</sup>H NMR spectrum of 5b(3)

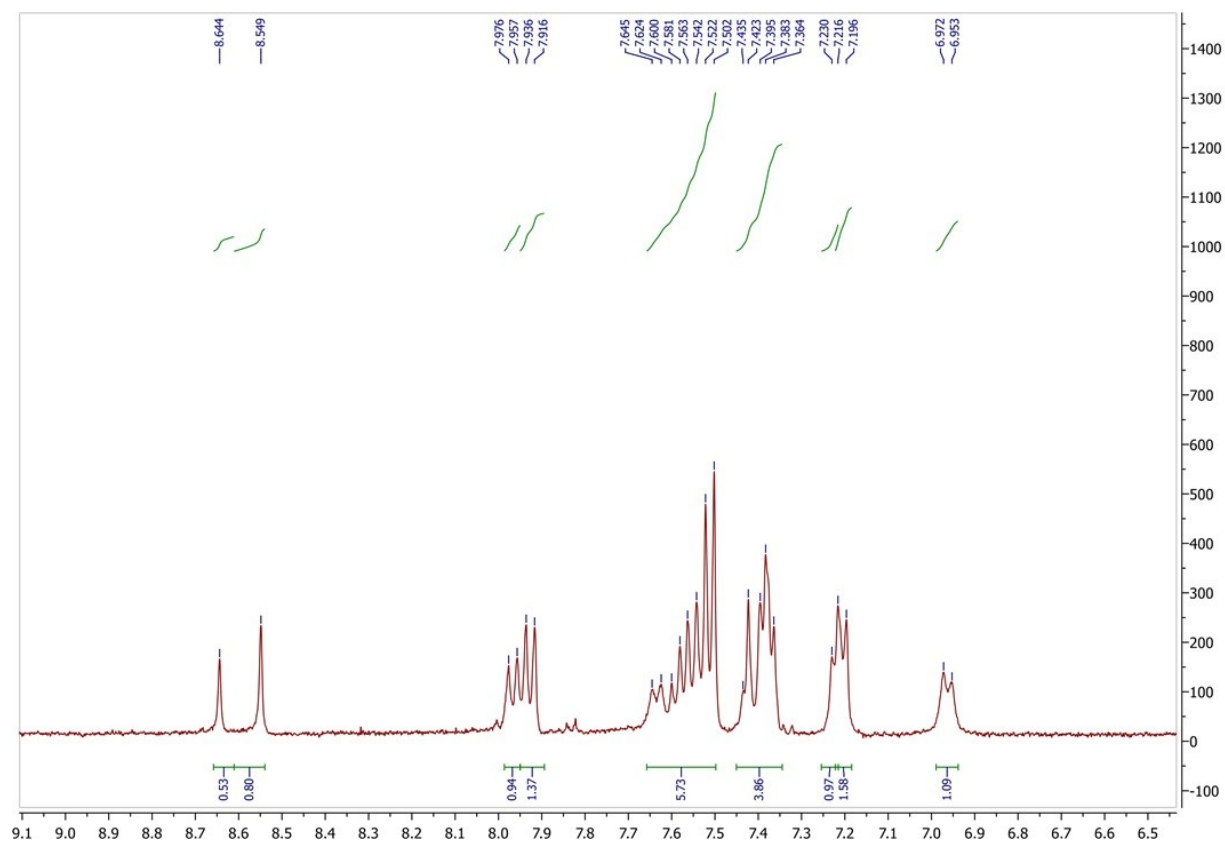

# <sup>1</sup>H NMR spectrum of 5c(1)

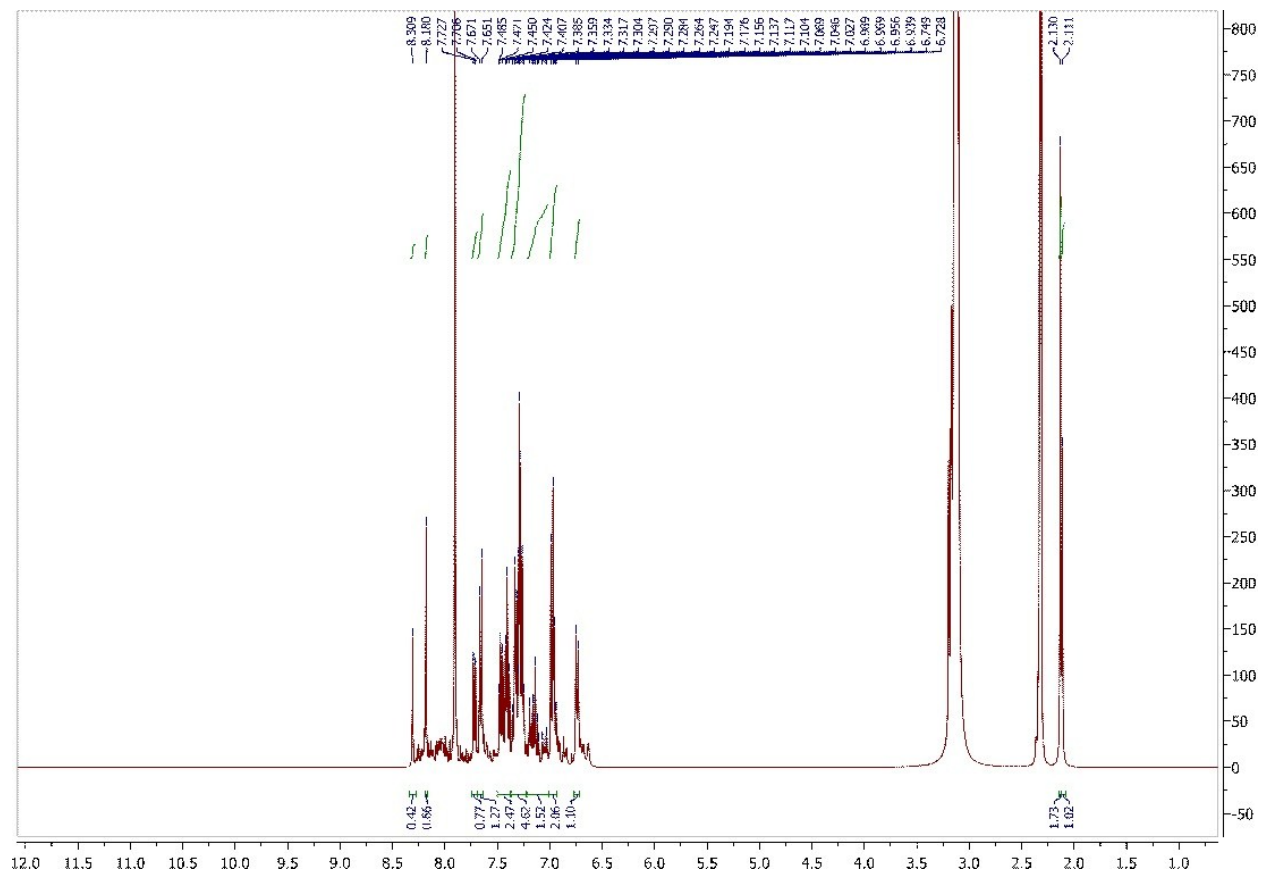

# <sup>1</sup>H NMR spectrum of 5c(2)

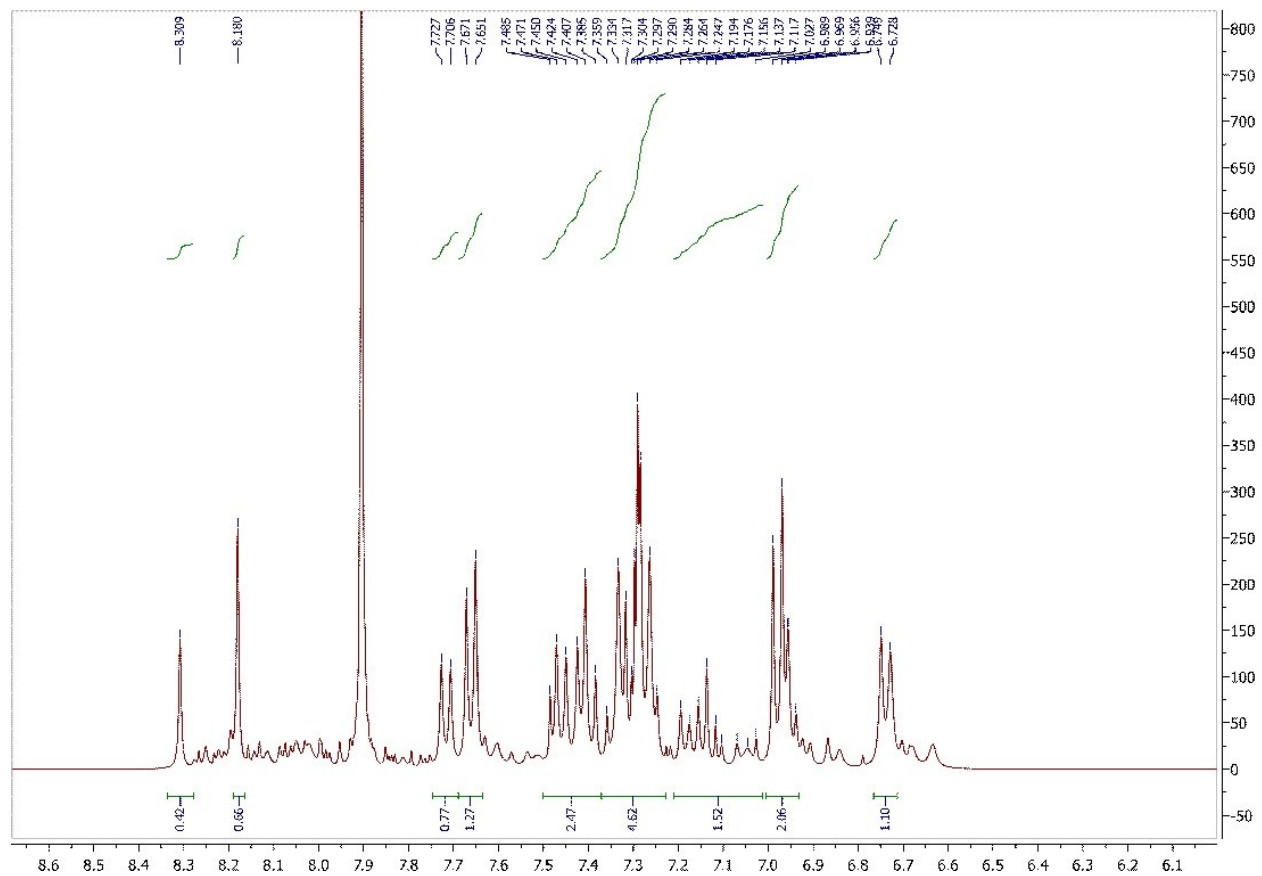

# <sup>1</sup>H NMR spectrum of 5d(1)

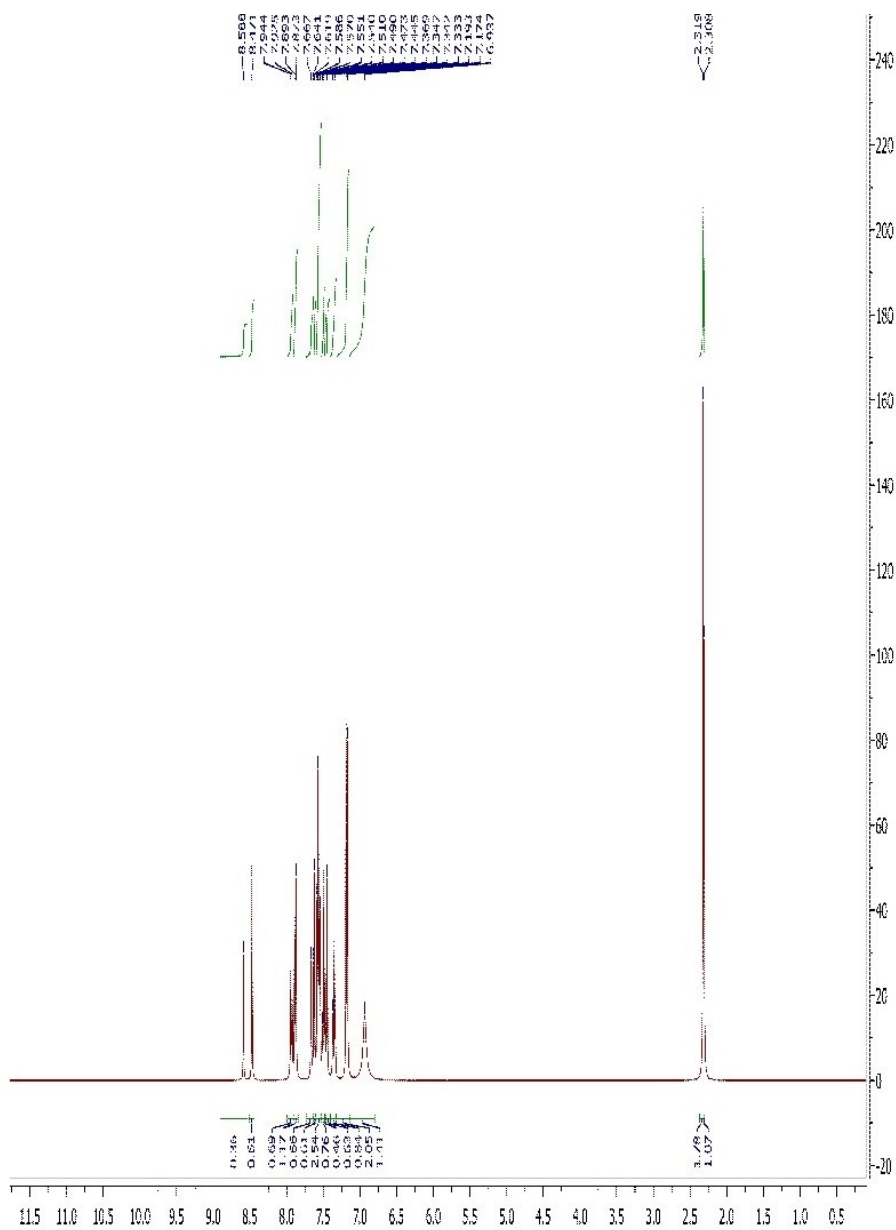

**NMR spectrum of 5d(2)**

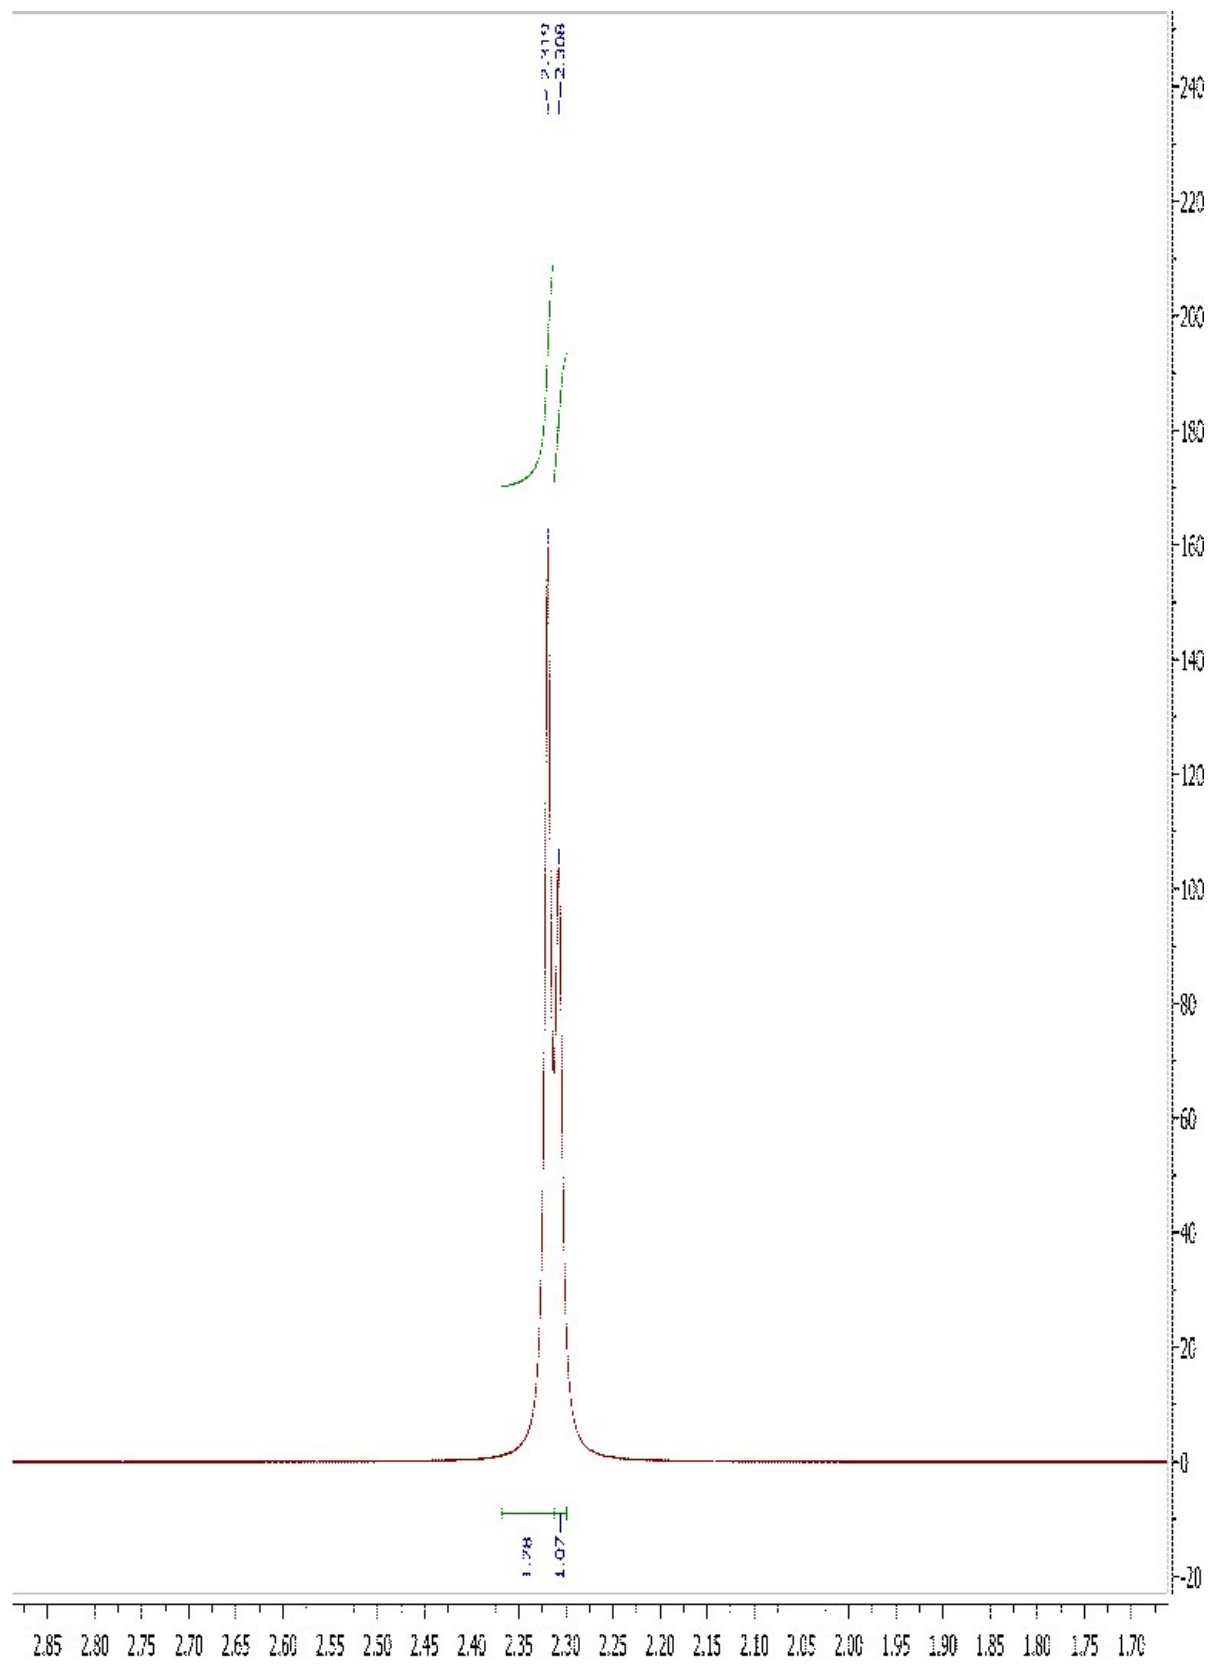

$^1\text{H}$  NMR spectrum of 5d(3)



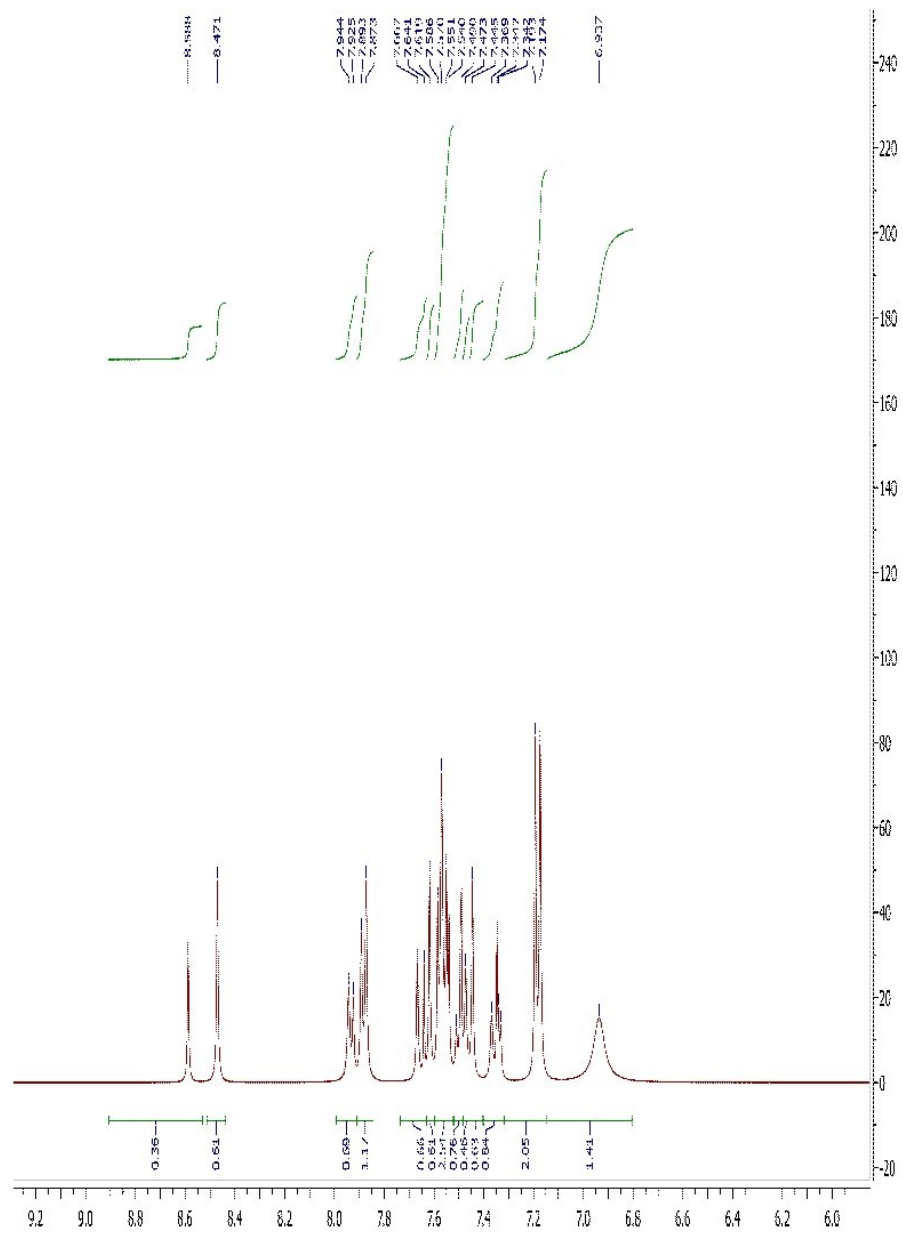

$^1\text{H}$  NMR spectrum of 5e(1)

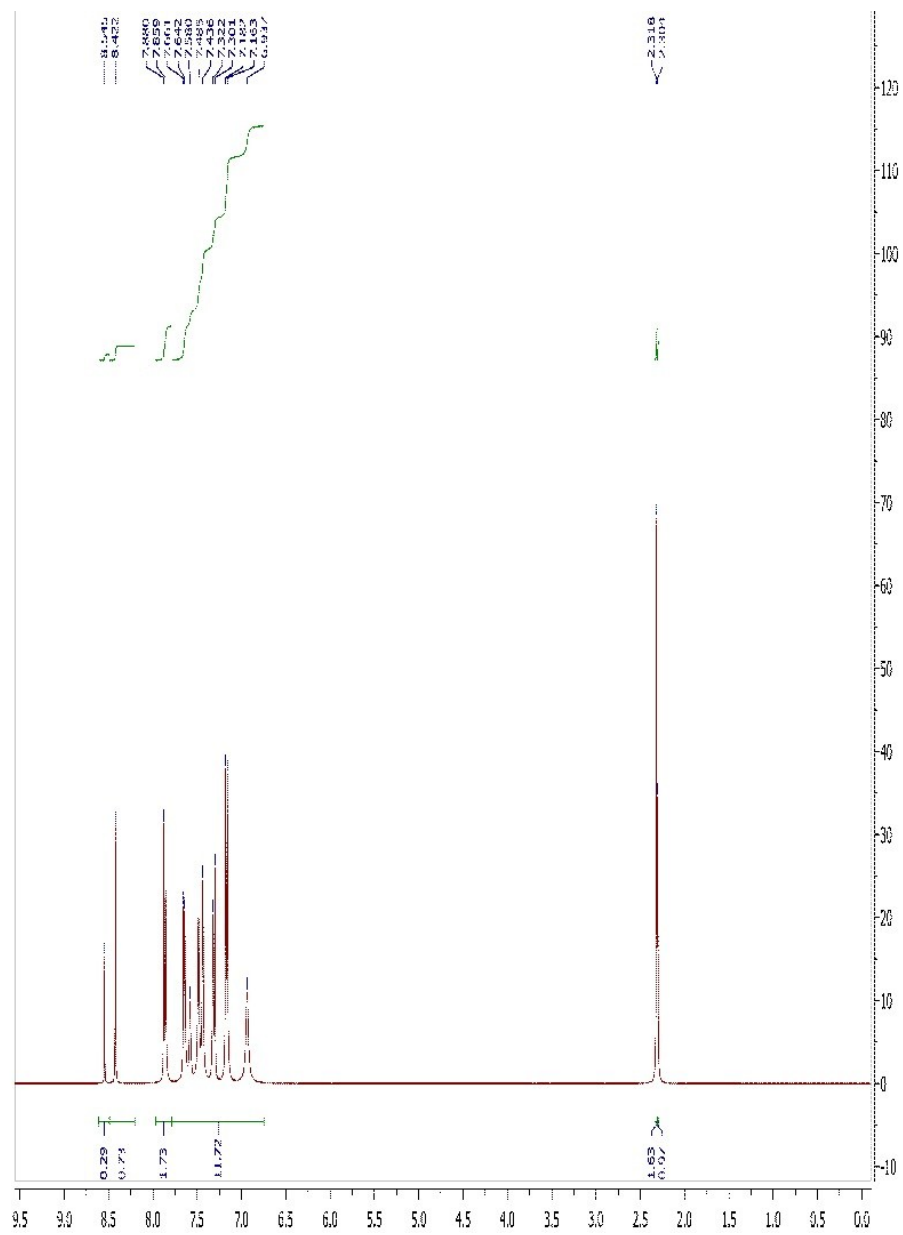

$^1\text{H}$  NMR spectrum of 5e(2)

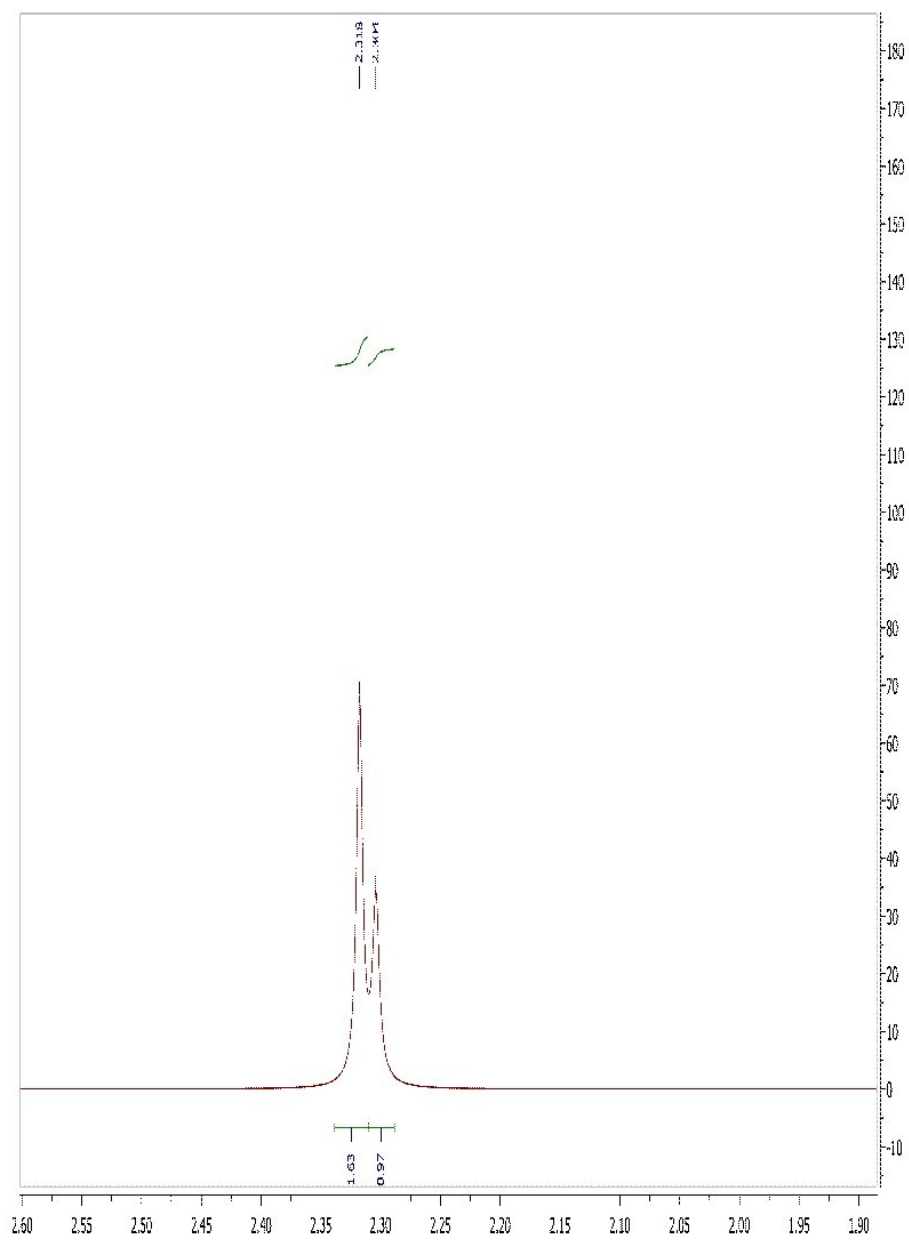

$^1\text{H}$  NMR spectrum of 5e(3)

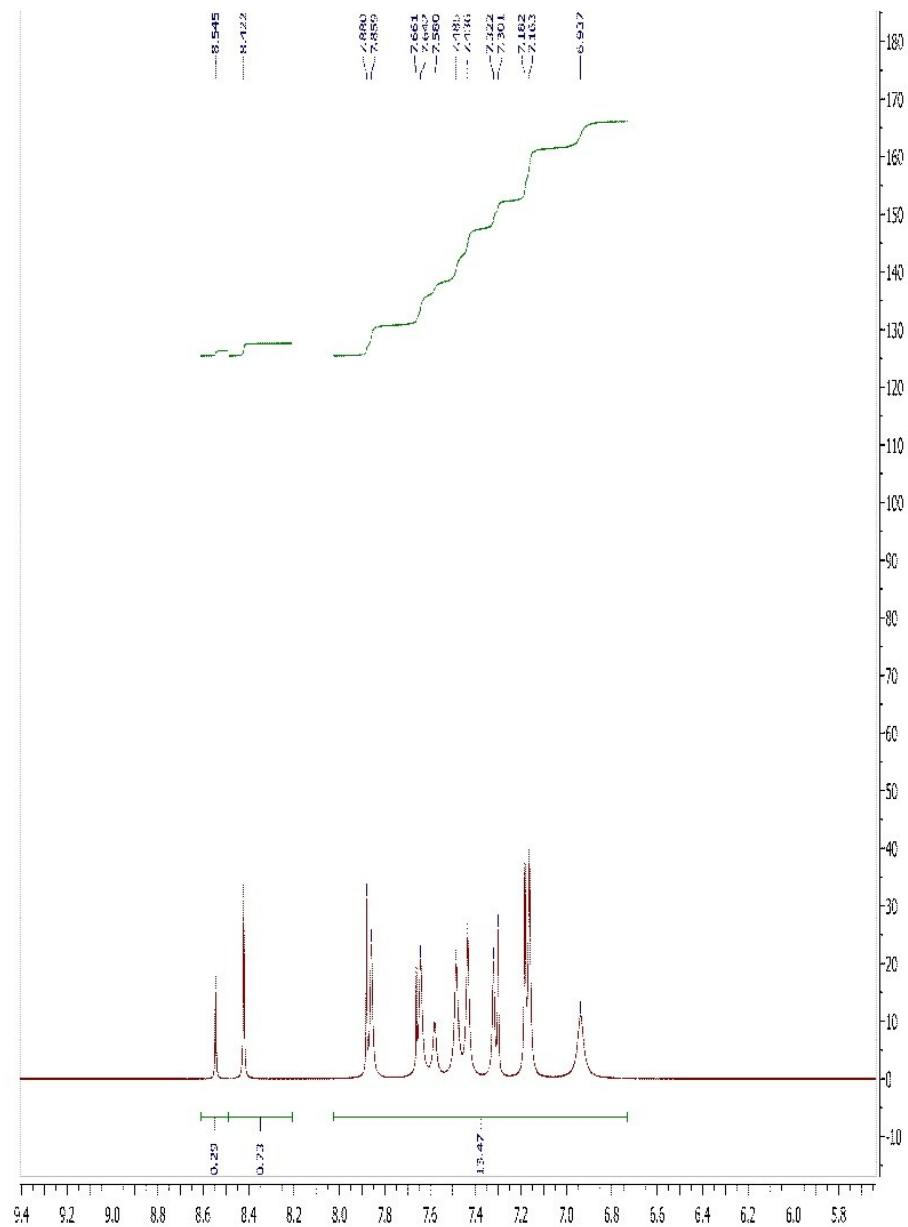

$^1\text{H}$  NMR spectrum of 5f(1)

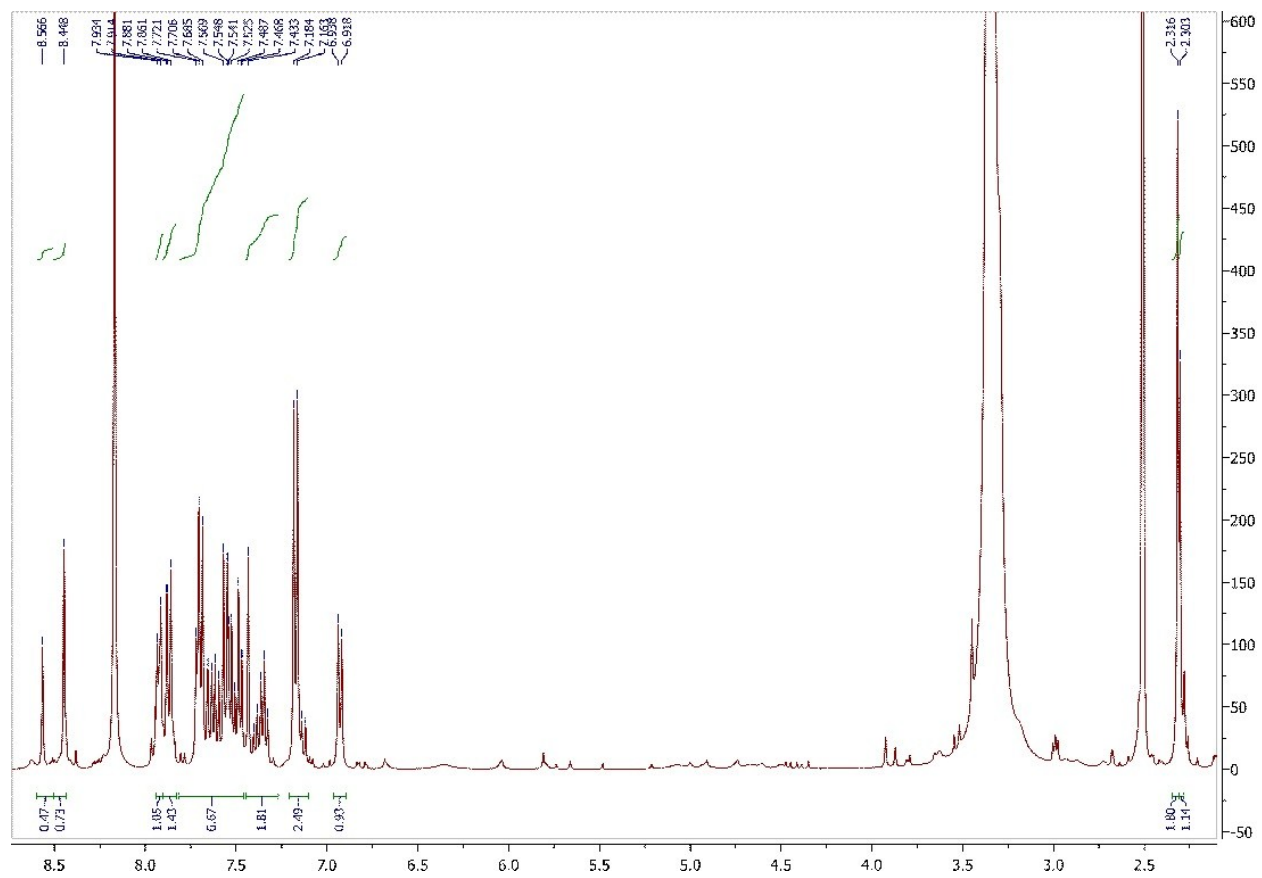

$^1\text{H}$  NMR spectrum of 5f(2)

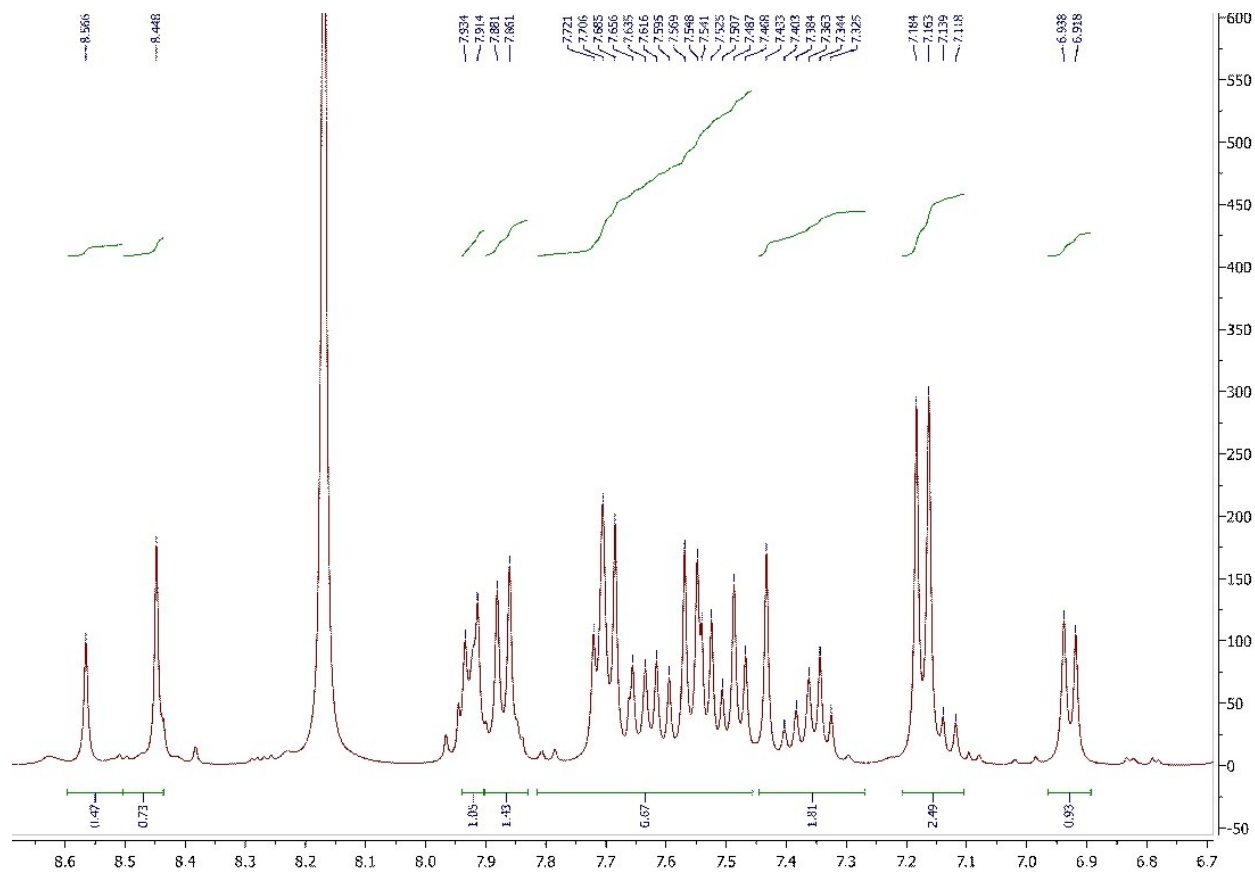

**<sup>1</sup>H NMR spectrum of 5f(3)**

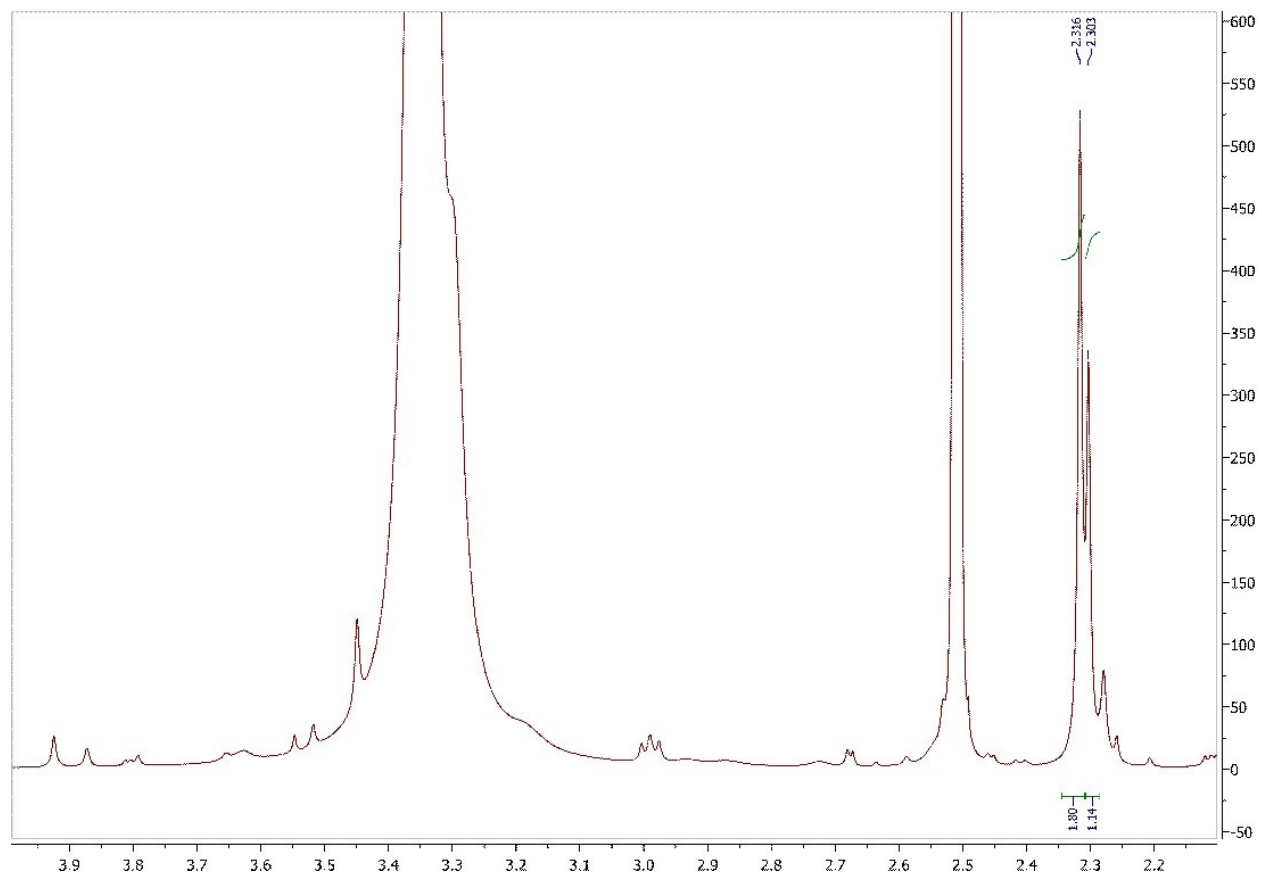

$^1\text{H}$  NMR spectrum of 5g(1)

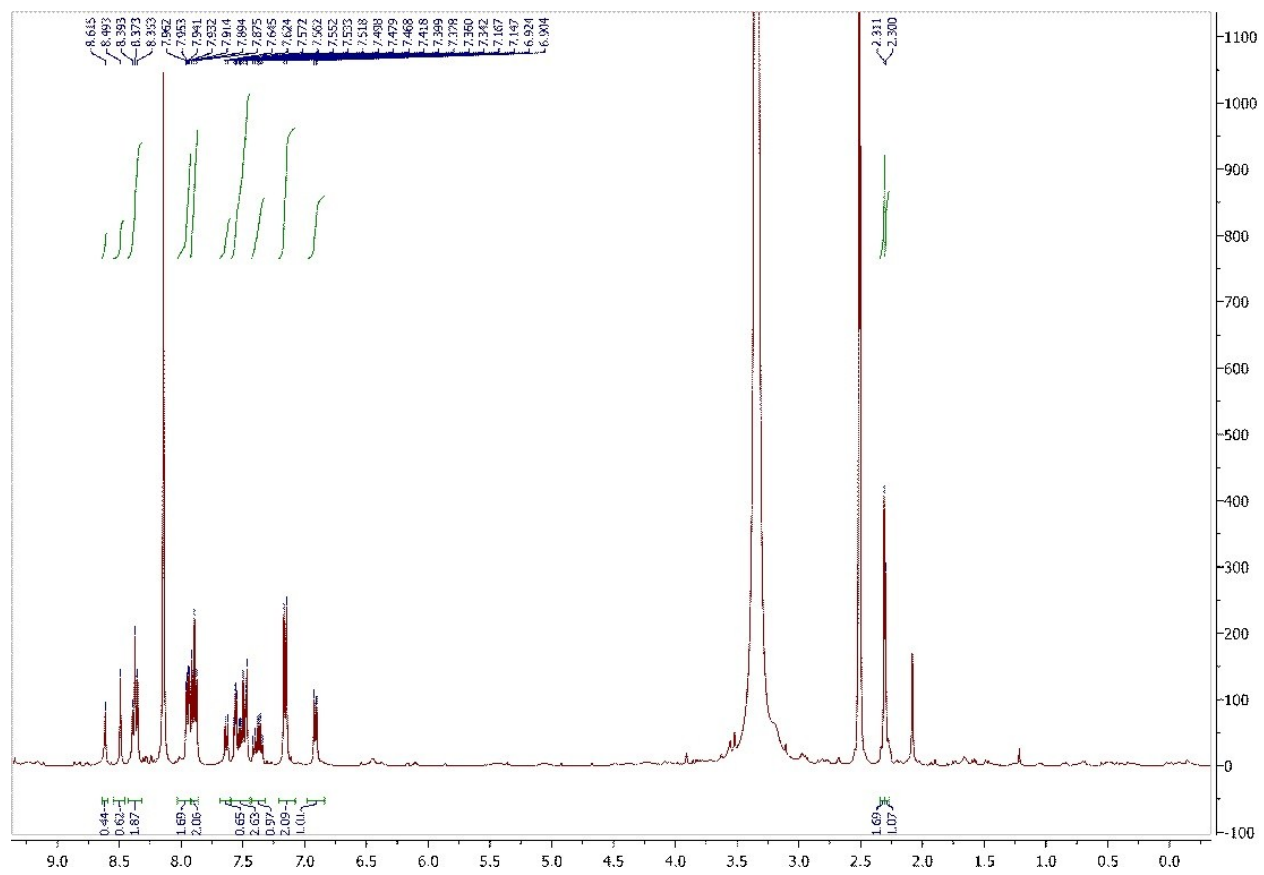

<sup>1</sup>H NMR spectrum of 5g(2)



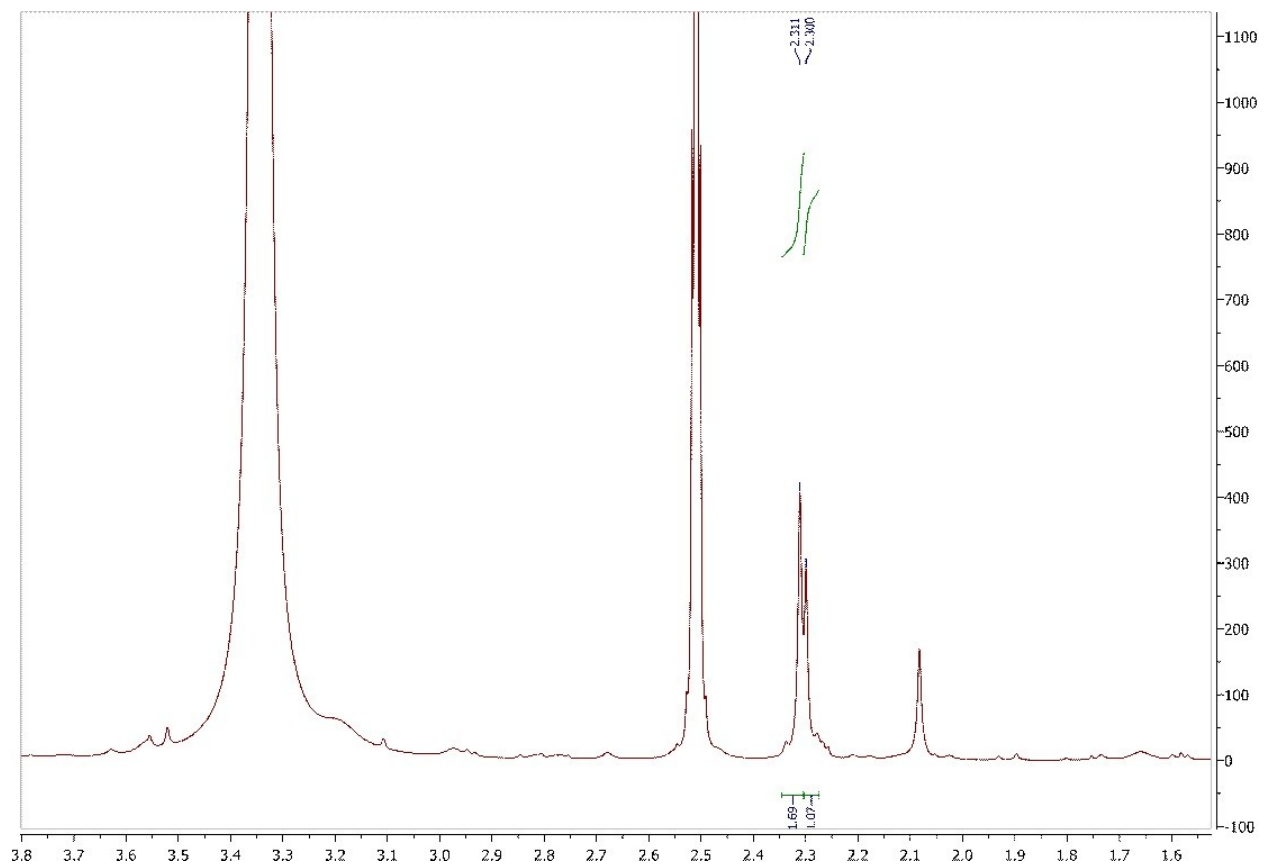

$^1\text{H}$  NMR spectrum of 5g(3)

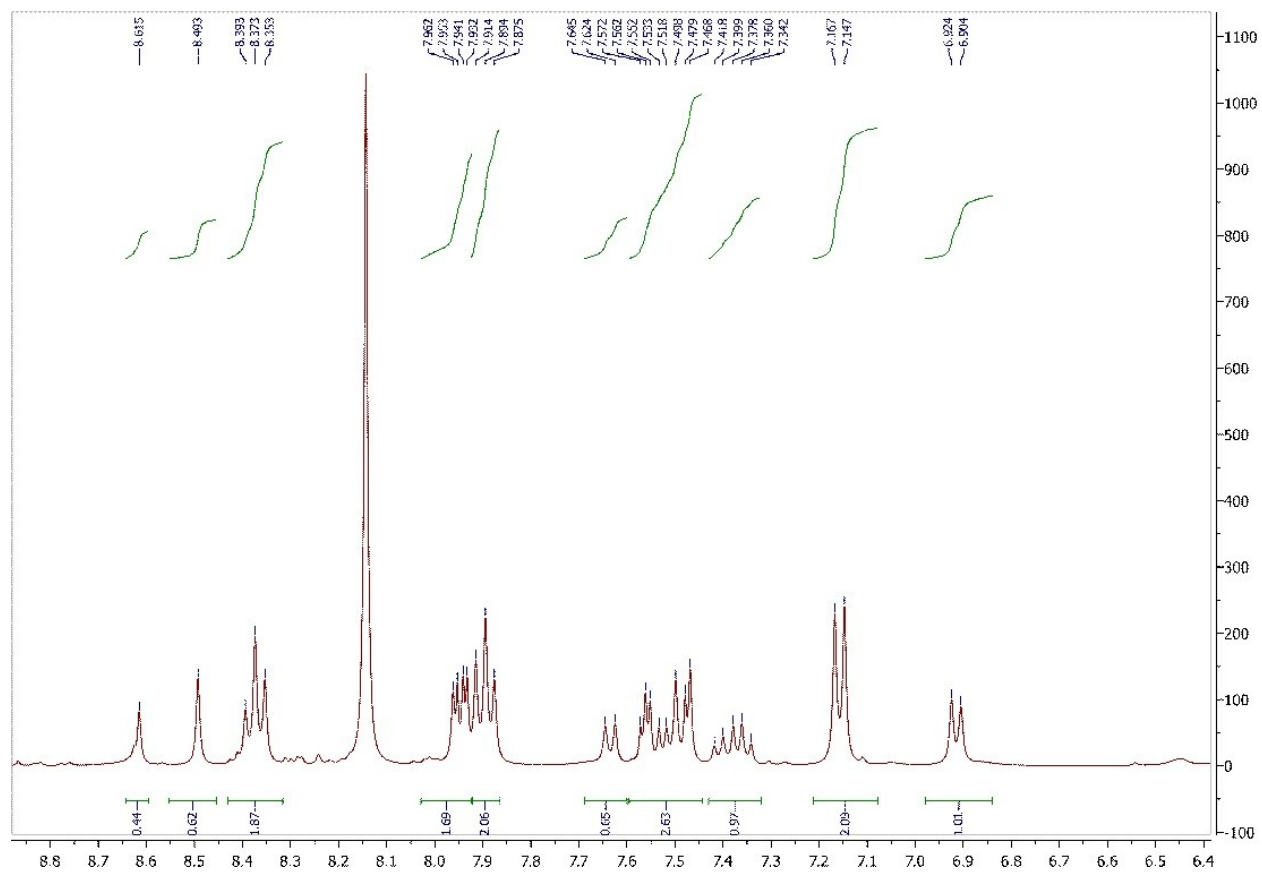

ESI-MS (m/z) of 5a(1)

WATERS, Q-TOF MICROMASS (ESI-MS)  
5a 3 (0.106) Cm (1:18)

SAIF/CIL,PANJAB UNIVERSITY,CHANDIGARH  
TOF MS ES-  
1.75e3

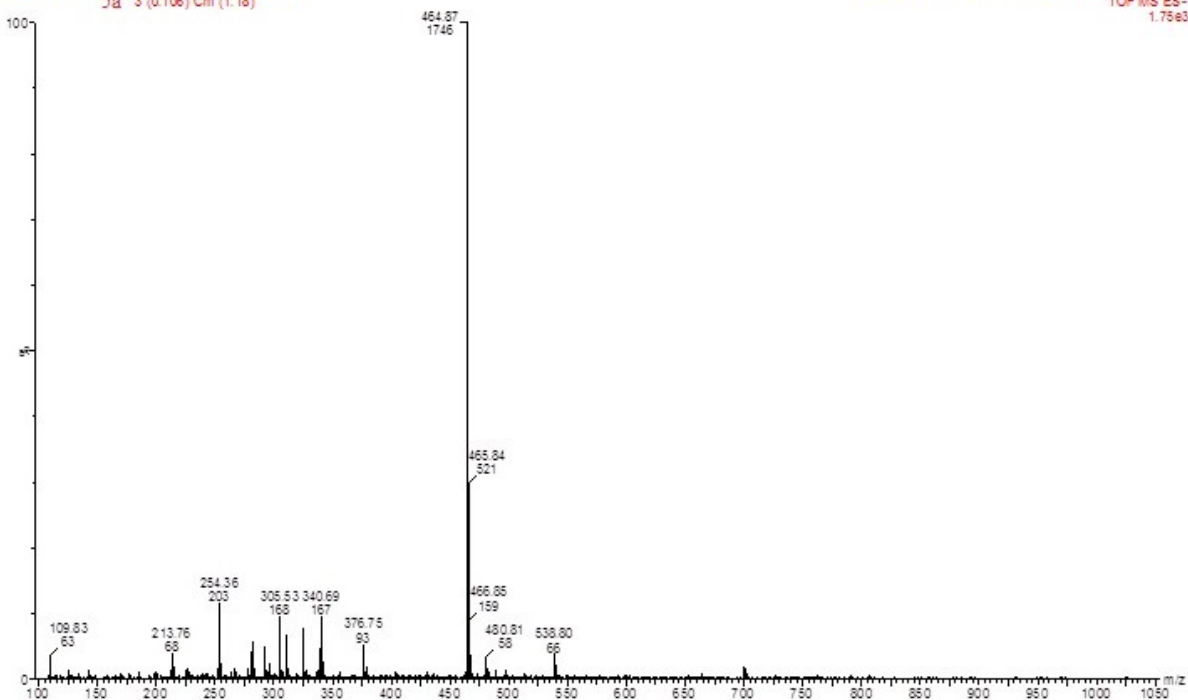

### ESI-MS (m/z) of 5b(1)

WATERS, Q-TOF MICROMASS (ESI-MS)  
5b 6 (0.119) Cm (4:13-17:35)

SAIF/CIL,PANJAB UNIVERSITY,CHANDIGARH  
TOF MS ES+  
7.13e3

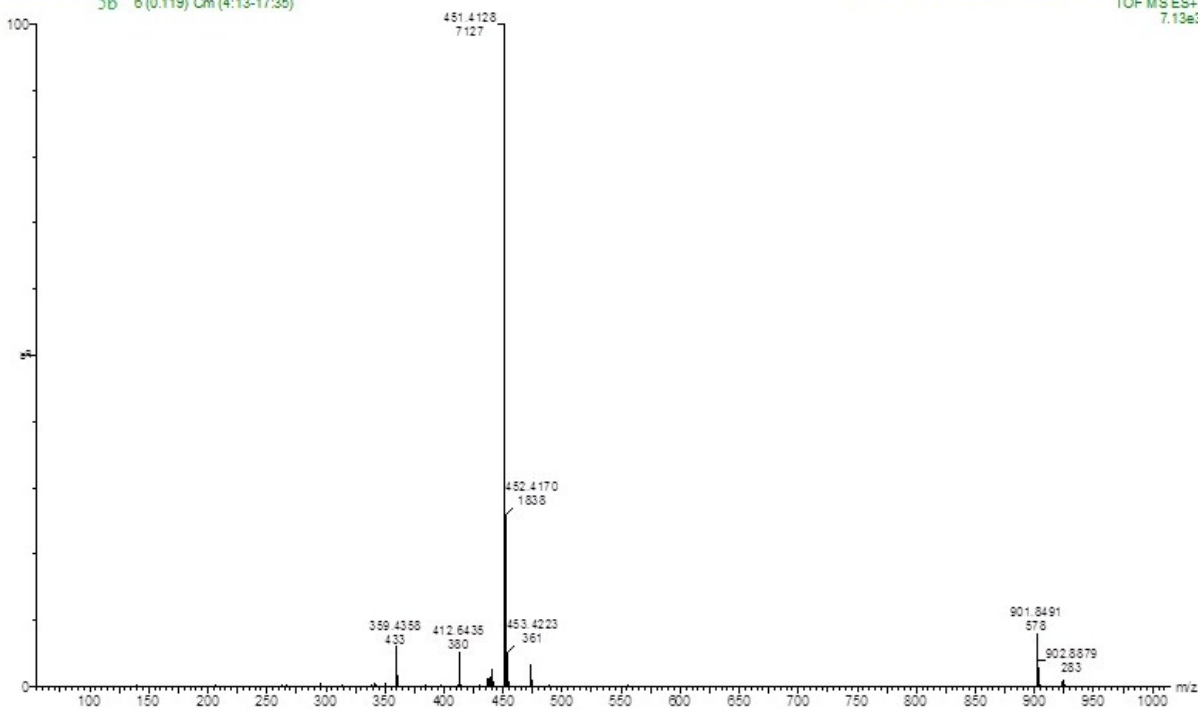

### Reference

1. H. Zhou, S. Wu, S. Zhai, A. Liu, Y. Sun, R. Li, Y. Zhang, S. Ekins, P. W. Swaan, B. Fang, B. Zhang and B. Yan, Design, *J. Med. Chem.*, 2008, **51**, 1242-1251.
